# Supplementary material for: The Balance of Cell Surface and Soluble Type III TGF-β Receptor Regulates BMP Signaling in Normal and Cancerous Mammary Epithelial Cells
Source: PubMed Central journal article supplement — Neoplasia. 2014 Jul 26;16(6):489–500. doi: 10.1016/j.neo.2014.05.008 (PMC4198744; doi:10.1016/j.neo.2014.05.008), 2014-07-26
Supplement: mmc2.pdf [file mmc2.pdf]

***Ectodomain shedding of T $\beta$ RIII is required for T $\beta$ RIII-mediated suppression of  
TGF- $\beta$  signaling and breast cancer migration and invasion***

Jennifer L. Elderbroom<sup>1</sup>, Catherine E. Gatza<sup>2</sup>, Tam How<sup>2</sup>, Mark Starr<sup>2</sup>, Andrew B. Nixon<sup>2</sup>, and  
Gerard C. Blobe<sup>1,2,\*</sup>

**Author Affiliations**

<sup>1</sup>Department of Pharmacology and Cancer Biology, Duke University, Durham, NC 27708

<sup>2</sup>Department of Medicine, Duke University, Durham, NC 27708

\*Address correspondence to: Gerard C. Blobe, Duke University Medical Center, Box 91004, Durham, North Carolina 27708, USA. Phone: 919-668-1359. Fax: 919-681-6906. E-mail: gerard.blobe@duke.edu.

## **Abstract**

The type III TGF- $\beta$  receptor (T $\beta$ RIII), also known as betaglycan, is the most abundantly expressed TGF- $\beta$  receptor. T $\beta$ RIII suppresses breast cancer progression through inhibiting migration, invasion, metastasis, and angiogenesis. T $\beta$ RIII binds TGF- $\beta$  ligands, with membrane-bound T $\beta$ RIII presenting ligand to enhance TGF- $\beta$  signaling. However, T $\beta$ RIII can also undergo ectodomain shedding, releasing soluble T $\beta$ RIII, which binds and sequesters ligand to inhibit downstream signaling. To investigate the relative contributions of soluble and membrane-bound T $\beta$ RIII on TGF- $\beta$  signaling and breast cancer biology, we defined T $\beta$ RIII mutants with impaired ( $\Delta$ Shed-T $\beta$ RIII) or enhanced ectodomain shedding (SS-T $\beta$ RIII). Relative to wild-type T $\beta$ RIII,  $\Delta$ Shed-T $\beta$ RIII increased TGF- $\beta$  signaling and abrogated T $\beta$ RIII's ability to inhibit breast cancer cell migration and invasion. Conversely, SS-T $\beta$ RIII, which increased soluble T $\beta$ RIII production, decreased TGF- $\beta$  signaling and increased T $\beta$ RIII-mediated inhibition of breast cancer cell migration and invasion. Taken together, these studies suggest that the ratio of soluble T $\beta$ RIII to membrane bound T $\beta$ RIII is an important determinant for regulation of T $\beta$ RIII- and TGF- $\beta$ -mediated signaling and biology.

## Introduction

The transforming growth factor  $\beta$  (TGF- $\beta$ ) signaling pathway is a critical regulator of many cellular processes including proliferation, differentiation, migration, invasion and angiogenesis. In normal epithelia and pre-malignant lesions, the TGF- $\beta$  signaling pathway functions both to maintain tissue homeostasis and suppress malignant initiation and progression. However, once transformation has occurred, cancer cells are able to subvert the actions of TGF- $\beta$  to promote cancer progression (Siegel and Massague, 2003). During malignant progression, the production of TGF- $\beta$  ligands in the tumor and stroma increases (Massague, 2008). However, most cancers develop resistance to the homeostatic effects of TGF- $\beta$ , including TGF- $\beta$ -induced growth inhibition (Elliott and Blobe, 2005), and respond instead with increased migration, invasion, and metastatic potential (Mooradian et al., 1992).

TGF- $\beta$  signals through heteromeric cell-surface receptor complexes consisting of a type I and type II receptor that upon ligand binding recruit and phosphorylate the Smad family of transcriptional regulators. In addition, there are a growing number of TGF- $\beta$  superfamily co-receptors, including the type III TGF- $\beta$  receptor (T $\beta$ RIII), which can modulate ligand presentation to the type II receptor (Bernabeu et al., 2009). T $\beta$ RIII, also known as betaglycan, is the most abundantly expressed TGF- $\beta$  receptor (Cheifetz et al., 1990). T $\beta$ RIII has an essential role in regulating TGF- $\beta$  signaling, mediated through its ability to bind TGF- $\beta$  ligands with high affinity. T $\beta$ RIII binds all three isoforms of TGF- $\beta$  (Wang et al., 1991), as well as bone morphogenetic proteins (BMPs) (Kirkbride et al., 2008), and inhibin (Lewis et al., 2000) through two distinct binding domains in its core protein, as well as bFGF through its heparan sulfate glycosaminoglycan (GAG) chains (Andres et al., 1992). Membrane-bound T $\beta$ RIII presents ligand

to T $\beta$ RII to increase signaling (Lopez-Casillas et al., 1993). However, T $\beta$ RIII can also undergo ectodomain shedding, releasing a soluble form that binds ligand in the extracellular space, thereby reducing ligand availability to the signaling receptors and inhibiting downstream signaling (Lopez-Casillas et al., 1994).

T $\beta$ RIII has a role as a suppressor of cancer progression in multiple types of cancer, including breast cancer (Dong et al., 2007). Breast cancer is the most common malignancy and the second most common cause of cancer related death in females in the United States (Siegel et al., 2012). In human breast cancers, TGF- $\beta$  levels are frequently elevated and correlate with a poor patient prognosis (Ghellal et al., 2000). T $\beta$ RIII expression is decreased in breast cancer cell lines and in human breast cancer patient specimens (Dong et al., 2007). Restoring T $\beta$ RIII expression suppresses breast cancer progression by inhibiting migration, invasion, metastasis, and angiogenesis (Dong et al., 2007)(Sun and Chen, 1997). Similar to the effects of restoring full-length T $\beta$ RIII expression, treatment with ectopic soluble T $\beta$ RIII inhibits tumor growth, angiogenesis and metastasis in breast cancer models (Bandyopadhyay et al., 1999). These data suggest that the tumor-suppressive effects of T $\beta$ RIII could be mediated, in part, by the production of soluble T $\beta$ RIII, which antagonizes the tumor promoting effects of TGF- $\beta$  signaling.

While the role of soluble T $\beta$ RIII can be investigated by the addition of recombinant soluble T $\beta$ RIII, the mechanisms regulating ectodomain shedding and generation of soluble T $\beta$ RIII remain undefined, making it more difficult to delineate the function of cell-surface T $\beta$ RIII, or the relative contribution of cell-surface T $\beta$ RIII and soluble T $\beta$ RIII to signaling and biology. Cleavage of many cell-surface proteins is carried out by a common machinery involving zinc-dependent metalloproteinases of the MMP and ADAM families. These proteases are regulated by several

mechanisms, including protein kinase C activation, intracellular calcium levels, and other activated growth factor signaling pathways (Arribas and Borroto, 2002). However, T $\beta$ RIII release is largely unaffected by PMA, calcium ionophores and other factors that induce cleavage of canonical transmembrane shedding substrates (Arribas et al., 1997). T $\beta$ RIII shedding can be reduced, but not blocked, with the pan-metalloproteinase inhibitor TAPI-2, as well as more specific inhibitors against MT1-MMP and MT3-MMP (Velasco-Loyden et al., 2004). However, studies with these inhibitors are complicated by their ability to alter the shedding of many other membrane proteins, making it difficult to use metalloprotease inhibition as a method to specifically determine the role of cell-surface T $\beta$ RIII. Here we adopted a structure-function approach by creating T $\beta$ RIII shedding mutants to investigate the significance of T $\beta$ RIII ectodomain shedding in TGF- $\beta$ -mediated signaling and T $\beta$ RIII-mediated biology during breast cancer progression.

## **Materials and Methods:**

***Cell culture and reagents, transfections, lentivirus production and infections-*** COS7, HEK293 and 293FT cells were maintained in Dulbecco's Modified Eagle's Medium (DMEM) (Gibco) with 10% Fetal Bovine Serum (FBS) (Invitrogen). HMEC cells were maintained in DMEM supplemented with 10% FBS and 0.01 mg/ml recombinant human insulin. MDA-MB-231 cells were grown in Modified Eagle's Medium (MEM) (Gibco) supplemented with 10% FBS, sodium pyruvate (Gibco) and non-essential amino acids (Gibco). All cells were incubated at 37°C with 5% CO<sub>2</sub>. For transfections, cells were plated to be ~70% confluent the following day (between 2-3 x 10<sup>5</sup> cells depending on cell line) on 6-well dishes. The following day, cells were transfected with either Fugene 6 (Roche) or X-treme Gene 9 (Roche) transfection reagent and 3 µg plasmid DNA at a ratio of 2.5:1. Experiments were performed on transfected cells 48-72 h post-transfection, as indicated. For lentivirus production, 293FT cells were plated in 10-cm dishes. Cells were transfected with Lipofectamine 2000 (Invitrogen) at a ratio of 3:1 to DNA- 6 µg TβRIII wild-type, mutant or empty vector (pSMPUW-Neo expression vector) (Cell Biolabs) and 3 µg each of 3 third generation lentiviral packaging plasmids (AddGene) in Opti-MEM (Gibco). Media was changed 6 h after transfection. 48 h later, media was collected, spun down to clear, and filtered through a 0.45 µm pore membrane. Viral media was aliquoted and stored at -80°C. For infections, viral media was added to cells in normal growth media at a ratio of either 1:10 or 1:100 in the presence of Polybrene at 6 µg/ml. To create stable lentiviral-expressing cell lines, 48 h post-infection media was changed and complete growth media containing 2 mg/ml G418 (KSE Scientific) was added as a selection agent. Following selection, stable lentiviral cell lines were maintained in complete growth media containing 0.5 mg/ml G418.

**Site-directed mutagenesis-** Primers for NAAIRS and alanine mutants were designed as in Supplemental Tables 1 and 2, respectively. Mutagenesis PCRs, digests, and transformations were performed using QuikChange XL Site-Directed Mutagenesis Kit (Stratagene). NAAIRS and alanine mutants were made in a pDNR-CMV Donor Vector (ClonTech) containing an N-terminally HA-tagged wild-type T $\beta$ RIII. Sequence analysis of all mutants was performed twice for verification.

**Binding and crosslinking-** 25,000 cells were plated on 6-well dishes. Cells were transfected 18-20 h later. 24 h later, media was removed and replaced with 1 ml complete growth media. Unless otherwise stated, media was conditioned for 18-20 h before being removed, and both cells and conditioned media incubated with <sup>125</sup>I-TGF- $\beta$ 1 (Perkin Elmer), at 100 pM and 25 pM, respectively, in the presence of BSA and protease inhibitors for 3 h at 4°C. After incubation, ligand was chemically crosslinked using 0.5 mg/ml disuccinimidyl suberate and quenched with 1M glycine. Cells were lysed with RIPA buffer supplemented with protease inhibitors, and ligand-receptor complexes were pulled down by immunoprecipitation overnight at 4°C with either an antibody against HA (Roche) or a polyclonal antibody against the extracellular domain of T $\beta$ RIII (R&D Systems). The resulting complexes were separated via SDS-PAGE and dried gels were exposed to an autoradiograph. Images were acquired with phosphorimaging and were analyzed using ImageJ software (NIH).

**Enzyme-linked Immunosorbent Assay (ELISA)-** 25,000 cells were plated in 6-well dishes and transfected the following day. After 24 h, media was removed and replaced with 1000  $\mu$ l full growth media. Culture medium was allowed to condition for 24 h (unless otherwise indicated), then was removed and immediately spun down at 4°C to pellet dead cells and debris. Cleared media was aliquoted and immediately placed at -80°C. For the T $\beta$ RIII ELISA, capture antibody (R&D Systems) was immobilized onto an E1A/R1A plate (Corning Inc.) overnight. After washing,

samples were loaded onto plate and incubated at room temperature for 2 h. Then detection antibody (R&D systems) was applied and incubated for 2 h, followed by Streptavidin-HRP (R&D systems) incubation for 30 min. Finally, Fast OPD substrate (Sigma) was added, 3M HCl was applied to stop reaction 30 min later, and optical absorbance at 490 nm was recorded immediately.

**Western blotting-** Cells were plated and transfected as described above. For HEK293 cells, 24 h after transfection, media was removed and replaced with serum-reduced (5% FBS) media. After 18-20 h cells were treated with TGF- $\beta$ 1 or TGF-  $\beta$ 2 (R&D Systems), at the concentrations and time-periods indicated. For MDA-MB-231 cells, media was removed and replaced with full serum media overnight before ligand treatment. Following ligand treatment, cells were lysed directly in 2X SB buffer and 20% of the lysate was loaded onto 10% SDS-PAGE gels. After electrophoresis, protein was transferred onto a PVDF membrane, which was blocked in 10% lowfat-milk in phosphate-buffered saline + 0.5% Tween-20 (PBS-T) for 1 h. Blots were probed overnight at 4°C with antibodies in 5% milk/PBS-T against phosphorylated Smad 2 (Cell Signaling), Total Smad2 (Cell Signaling),  $\beta$ -actin (Sigma-Aldrich), or T $\beta$ RIII-ECD (R & D Systems), and then probed for 1 h with horseradish-peroxidase conjugated secondary antibodies (Cell Signaling, Amersham). Bands were visualized using ECL (Western Lightning ECL Pro, Perkin Elmer) and exposure to film, and densitometry was quantified using ImageJ software (NIH).

**Thymidine Incorporation Assay-** 1500 cells were plated in 96-well plates, either in the absence or presence of 50 pM TGF- $\beta$ 1 (each condition in triplicate), in pre-conditioned media (conditioned for 24 h from cells expressing EV or corresponding T $\beta$ RIII mutants). 20 h after plating, 1  $\mu$ Ci of  $^3$ H-Thymidine (Perkin Elmer) was added to each well, and allowed to incubate for 4 h. After incorporation, cells were washed 2x with cold PBS, 1x with cold 10% trichloroacetic acid (TCA),



then rocked at 4°C for 1 h in 10% TCA. Then, cells were washed 1x with 10% TCA, and 0.2N NaOH was added to cells to lyse overnight. The following day, lysates were added to 2 ml scintillation fluid (Ultima-Gold, Perkin Elmer) and the amount of incorporation was determined by scintillation counting.

**Transwell Migration Assay-** 25,000 cells in serum-free conditioned media (24 h from corresponding cell lines) were plated in the upper chamber of a 50 µg/ml fibronectin-coated transwell with 8 µm pores (Corning Inc.). Cells were either left untreated, or treated with 50 pM TGF-β1 (each condition in duplicate). Media containing serum was used as a chemoattractant in the bottom well, and cells were allowed to migrate for 24 h. After migration, the cells remaining on the top of the filter were removed by gently washing with a cotton swab, and migrated cells on the bottom of the filter were fixed in methanol and stained with H&E. Filters were cut out, mounted onto slides and examined microscopically. 3 random fields of cells were chosen and counted.

**Matrigel Invasion Assay-** 75,000 cells in serum-free conditioned media (24 h from corresponding cell lines) were plated in the upper chamber of a Matrigel-coated transwell with 8 µm pores (BD Biosciences). Cells were either left untreated, or treated with 50 pM TGF-β1 (each condition in duplicate). Media containing serum was used as a chemoattractant in the bottom well, and cells were allowed to invade for 24 h. After invasion, the cells remaining on the top of the filter were removed by gently washing with a cotton swab, and invaded cells on the bottom of the filter were fixed in methanol and stained with H&E. Filters were cut out, mounted onto slides and examined microscopically. 3 random fields of cells were chosen and counted.

**Dual-Luciferase Reporter Assay-** 100,000 cells were plated in 6-well plates. 24 h later, cells were transfected with 2.3 µg of pE2.1 luciferase reporter plasmid and 0.2 µg of pRL-SV40 renilla

plasmid. The next day, cells were treated with 24 h pre-conditioned serum-free media, and 50 pM of TGF- $\beta$ 1 or TGF- $\beta$ 2. 20 h later cells were lysed and the dual-luciferase reporter assay (Promega) was performed per kit instructions.

**Statistical Analysis-** Data are presented as mean  $\pm$  SEM. One-way or two-way ANOVAs were performed followed by either a one-sample Student's *t*-test for values compared to a normalized control, or either a Tukey's Test or a Two-tailed Student's *t*-test for comparing two experimental values. P values  $< 0.05$  are considered significant.

## Results

### *Mutations in the juxtamembrane region of T $\beta$ RIII alter ectodomain shedding*

To investigate the significance of T $\beta$ RIII ectodomain shedding on TGF- $\beta$ -mediated signaling and biology, we set out to identify T $\beta$ RIII mutants with altered ectodomain shedding. Human T $\beta$ RIII is an 851 amino acid transmembrane proteoglycan with a large 766 amino acid extracellular domain, a single hydrophobic transmembrane region, and a short 42 amino acid cytoplasmic domain (Lopez-Casillas et al., 1991). Endogenous soluble T $\beta$ RIII has nearly the same electrophoretic mobility as full-length, membrane bound T $\beta$ RIII (Figure 1A), suggesting that cleavage occurs just proximal to the plasma membrane, consistent with what has been demonstrated with other shed receptors (Perez-Torres et al., 2008). A substitution mutagenesis approach replacing 6 amino acids of the endogenous T $\beta$ RIII protein sequence with the NAAIRS amino acid sequence (Asparagine-Alanine-Alanine-Isoleucine- Arginine-Serine) was chosen, as this sequence can adopt multiple secondary structures, potentially minimizing structural changes (Hamad et al., 2002). To identify regions important for T $\beta$ RIII shedding, a series of T $\beta$ RIII NAAIRS mutants beginning 95 amino acids upstream of the transmembrane region and spanning the entire juxtamembrane region was created (Figure 1B, Supp. Table 1).

We initially assessed and confirmed expression of all 17 mutants (M0-M16) in COS7 cells, which lack endogenous T $\beta$ RIII (Figure 1C). To evaluate processing to the cell surface, ligand binding ability and ectodomain shedding, we performed iodinated TGF- $\beta$ 1 binding and crosslinking assays on both the conditioned media from COS7 cells and on COS7 cells expressing either controls (pDNR-EV or pDNR-WT-T $\beta$ RIII) or one of the membrane-proximal T $\beta$ RIII NAAIRS mutants (M0-M16), followed by immunoprecipitation of T $\beta$ RIII and soluble T $\beta$ RIII. While all T $\beta$ RIII NAAIRS mutants trafficked to the cell surface and bound ligand, there were significant

differences in the electrophoretic mobility of the mutants (Figure 1D), suggesting differential post-translational processing of the T $\beta$ RIII mutants. However, by directly comparing levels of ligand binding to soluble T $\beta$ RIII in the conditioned media to levels of ligand binding to membrane-bound T $\beta$ RIII on the cell surface, ectodomain shedding of each mutant could be assessed independently of these factors. Four NAAIRS mutants (M1, M2, M9 and M11) consistently exhibited decreased ectodomain shedding compared to wild-type T $\beta$ RIII controls (Figure 1D, E). Interestingly, three NAAIRS mutants (M13, M14, M15) exhibited increased ectodomain shedding compared to wild-type T $\beta$ RIII controls (Figure 1D, E). These differences in shedding were independently confirmed by performing ELISA analysis for soluble T $\beta$ RIII (Figure 1F).

#### ***A single amino acid substitution at m742 significantly inhibits T $\beta$ RIII ectodomain shedding***

To further define the distinct amino acid residues regulating ectodomain shedding of T $\beta$ RIII, we created individual alanine point mutations in T $\beta$ RIII of each amino acid contained within the NAAIRS mutants M1, M2, M9 and M11 (Supp. Table 2). Expression of each mutant was confirmed via western blotting (Figure 2A, Supp. Figure 1A). Ectodomain shedding of each mutant was evaluated via both <sup>125</sup>I-TGF- $\beta$ 1 binding and crosslinking assays and ELISA. Perturbing any amino acid residue within the M9 mutant disrupted ectodomain shedding to some degree, and substituting methionine 742 to alanine (M742A) fully recapitulated the decreased ectodomain shedding phenotype of the M9 NAAIRS mutant (Figure 2B-D). Mutation of isoleucine 738 to alanine (I738A) also significantly decreased ectodomain shedding (Figure 2B-D). In contrast, no single point mutations within M1, M2 or M11 NAAIRS mutants significantly altered ectodomain shedding (Supp. Figure 1B, C).

As the M9 NAAIRS, M11 NAAIRS, M742A and I738A mutants all significantly diminished but did not abrogate ectodomain shedding, we created mutants that combined the M742A and I738A mutations within M9 and the L752A and V754A mutations within M11. However, neither of these mutants exhibited any further decrease in shedding compared to the M9 or M742A mutations alone (data not shown). Therefore, we utilized the M9 NAAIRS and the M742A mutants as our models for shedding-deficient T $\beta$ RIII ( $\Delta$ shed-T $\beta$ RIII), and M13 as a 'super-shedder' (SS-T $\beta$ RIII) to investigate the effects of altering the ratio of soluble to cell-surface T $\beta$ RIII. To investigate whether the shedding properties of these mutants were retained in different cell contexts, we transiently expressed the mutants in human embryonic kidney epithelial cells (HEK-293) and in mink lung epithelial cells (Mv1Lu). In all cases, the M9 NAAIRS and M742A mutants exhibited reduced ectodomain shedding, and the M13 NAAIRS mutant exhibited increased ectodomain shedding (Supp. Figure 2A).

To investigate the effects of increased or decreased T $\beta$ RIII ectodomain shedding in breast cancer, we utilized the well-characterized breast cancer cell line MDA-MB-231, in which we and others have already demonstrated the ability of T $\beta$ RIII and soluble T $\beta$ RIII to regulate its cancer biology, including migration and invasion *in vitro* and *in vivo* (Bandyopadhyay et al., 1999; Dong et al., 2007). MDA-MB-231 cells exhibit low endogenous T $\beta$ RIII levels, consistent with loss of T $\beta$ RIII expression during breast cancer progression. WT-T $\beta$ RIII,  $\Delta$ shed-T $\beta$ RIII, SS-T $\beta$ RIII or an empty-vector DNA control were stably incorporated into MDA-MB-231 cells via lentiviral infection and single clones were selected, expanded and examined for T $\beta$ RIII expression and ectodomain shedding via <sup>125</sup>I-TGF- $\beta$ 1 binding and crosslinking assays. Monoclonal MDA-MB-231 cell lines with equivalent levels of cell-surface T $\beta$ RIII were chosen for further study (Figure 2E), and the

expected levels of soluble T $\beta$ RIII production were confirmed via binding and crosslinking (Figure 2E) and ELISA (Figure 2F).

### ***Effects of altered T $\beta$ RIII ectodomain shedding on TGF- $\beta$ signaling***

In many cell lines, including MDA-MB-231 cells, increasing T $\beta$ RIII expression results in decreased TGF- $\beta$  signaling, as measured by Smad2 phosphorylation and transcription of TGF- $\beta$ -responsive genes (Dong et al., 2007). As increasing T $\beta$ RIII expression can result in increased soluble T $\beta$ RIII (Lopez-Casillas et al., 1991), and soluble T $\beta$ RIII is sufficient to inhibit downstream TGF- $\beta$  signaling (Arribas and Borroto, 2002), this T $\beta$ RIII-mediated decrease in TGF- $\beta$  responsiveness has been hypothesized to be the result of increased production of soluble T $\beta$ RIII. To directly address this hypothesis, and to examine the effects of high levels of cell-surface T $\beta$ RIII in the absence of soluble T $\beta$ RIII on TGF- $\beta$  signaling, we utilized the stable MDA-MB-231 T $\beta$ RIII ectodomain shedding mutant cell lines. Consistent with prior studies, compared to empty vector control MDA-MB-231 cells, WT-T $\beta$ RIII expressing cells exhibited slightly decreased TGF- $\beta$ 1-mediated Smad2 phosphorylation (Figure 3A). In contrast, in  $\Delta$ shed-T $\beta$ RIII cells, TGF- $\beta$ 1-mediated Smad2 phosphorylation was increased, suggesting that in the absence of significant ectodomain shedding, cell-surface T $\beta$ RIII is able to present ligand and enhance signaling (Figure 3A). Consistent with this hypothesis, relative to WT-T $\beta$ RIII cells, TGF- $\beta$ 1-mediated Smad2 phosphorylation was further reduced in SS-T $\beta$ RIII cells (Figure 3A). A dose response curve from 0-100 pM TGF- $\beta$ 1 demonstrated a similar pattern of responsiveness at all concentrations tested (Figure 3B). To determine whether alterations in Smad2 phosphorylation were leading to changes in gene transcription, dual-luciferase reporter assays were performed using the TGF- $\beta$ -responsive pE2.1 promoter. While there was no significant difference between WT-T $\beta$ RIII and EV expressing cells,

SS-T $\beta$ RIII cells treated with TGF- $\beta$ 1 had decreased TGF- $\beta$ -induced transcription (Figure 3C). Conversely, cells stably expressing the  $\Delta$ shed-T $\beta$ RIII had significantly increased TGF- $\beta$ 1-mediated pE2.1 transcription (Figure 3C). To establish whether the observed changes in signaling were due to changes in soluble T $\beta$ RIII levels, we treated cells with ectopic recombinant soluble T $\beta$ RIII. Recombinant soluble T $\beta$ RIII reduced TGF- $\beta$  signaling in a dose-dependent manner in each cell line, with the exception of the SS-T $\beta$ RIII expressing cells (Supp. Figure 3), perhaps because signaling is already maximally inhibited by the increased levels of soluble T $\beta$ RIII produced by this cell line. Together, these data demonstrate that the decrease in TGF- $\beta$  responsiveness frequently observed when T $\beta$ RIII is expressed requires T $\beta$ RIII ectodomain shedding and generation of soluble T $\beta$ RIII.

We next examined the effects of the shedding mutants on mediating TGF- $\beta$ 2 signaling. As TGF- $\beta$ 2 cannot bind to T $\beta$ RII on its own (De Crescenzo et al., 2006), TGF- $\beta$ 2 requires T $\beta$ RIII for presentation to T $\beta$ RII and functional signaling. Consistent with this role, both WT-T $\beta$ RIII and the  $\Delta$ shed mutant increased TGF- $\beta$ 2 responsiveness in MDA-MB-231 cells (Supp. Figure 4). However, the high ratio of soluble T $\beta$ RIII relative to cell-surface T $\beta$ RIII in the SS-T $\beta$ RIII expressing cells shifted the balance from T $\beta$ RIII-mediated promotion of signaling to inhibition of signaling (Supp. Figure 4).

To investigate the effects of T $\beta$ RIII ectodomain shedding on the kinetics and duration of TGF- $\beta$  signaling, we performed time-course experiments. In the absence of significant soluble T $\beta$ RIII (EV and  $\Delta$ shed-T $\beta$ RIII), Smad2 phosphorylation peaked at  $\sim$  one hour and signaling persisted out to six hours (Figure 4A). In contrast, in cells with higher levels of soluble T $\beta$ RIII (WT-T $\beta$ RIII and SS-T $\beta$ RIII), Smad2 phosphorylation peaked earlier ( $\sim$  30 minutes), and signaling persisted only out to two to three hours (Figure 4A,B). Similar results were obtained by transient transfection of these T $\beta$ RIII shedding mutants in the normal human epithelial cell line HEK293

(Supp. Figure 5). Interestingly, we also consistently observed evidence of a biphasic signaling pattern in the  $\Delta$ shed-T $\beta$ RIII cell line, with signal diminishing between three to four hours, but then returning to nearly peak levels at five hours post-treatment (Figure 4A,B). Integrating the signaling that occurred over the six hour period demonstrated a 50% reduction in total signaling in WT-T $\beta$ RIII expressing cells compared to  $\Delta$ shed-T $\beta$ RIII (Figure 4C). These data establish an important role for the ratio of soluble and cell-surface T $\beta$ RIII in regulating the kinetics and magnitude of TGF- $\beta$  signaling.

### ***Effects of altered T $\beta$ RIII ectodomain shedding on TGF- $\beta$ -mediated migration and invasion***

T $\beta$ RIII inhibits epithelial and cancer cell motility and invasion in multiple human cancers, including breast cancer (Finger et al., 2008; Lambert et al., 2011; Myhre and Blobe, 2009; Turley et al., 2007). Increasing wild-type T $\beta$ RIII expression in MDA-MB-231 cells inhibited TGF- $\beta$ -induced transwell migration and invasion (Dong et al., 2007). Similarly, plating MDA-MB-231 cells in conditioned media from COS7 cells over-expressing T $\beta$ RIII also reduced TGF- $\beta$ -induced invasion (Dong et al., 2007), suggesting that the production of soluble T $\beta$ RIII is one mechanism for T $\beta$ RIII-mediated inhibition of cell motility and invasion. To directly determine the contribution of T $\beta$ RIII ectodomain shedding and soluble T $\beta$ RIII production on T $\beta$ RIII-mediated inhibition of migration and invasion, we utilized the monoclonal stable MDA-MB-231 cell lines expressing the T $\beta$ RIII shedding mutants. As these experiments are usually performed in serum-free media, we first examined the effect of serum on T $\beta$ RIII ectodomain shedding. In the absence of serum, ectodomain shedding was potently inhibited (Supp. Figure 6). Therefore, for these experiments, cells were plated in media that had been pre-conditioned for 24 hours, to more accurately reflect the differential levels of ectodomain shedding. We next investigated whether expression of the



TβRIII shedding mutants altered the proliferation rates of the stable cell lines using <sup>3</sup>H-thymidine incorporation assays. Over 24 hours, the time frame for both the invasion and migration assays, there was a decrease in the basal proliferation rates of WT-TβRIII, Δshed-TβRIII and SS-TβRIII compared to EV control cells of ~40%, 30% and 50%, respectively (Supp. Figure 7). TGF-β treatment also slightly reduced proliferation rates in all four cell lines (Supp. Figure 7). To reflect these changes, migration and invasion results were normalized to the proliferative index of each corresponding condition.

While TGF-β1 stimulated migration of the MDA-MB-231 cells expressing EV, cells expressing WT-TβRIII were unresponsive to ligand (Figure 5A,B). Conversely, cells expressing Δshed-TβRIII demonstrated a 3-fold increase in basal migration and an increase in ligand-mediated migration relative to EV control cells (Figure 5A,B). Expressing SS-TβRIII had an even more potent effect on motility than WT-TβRIII, producing a significant decrease in ligand-induced transwell migration (Figure 5A,B). Similar results were obtained by transient transfection of the TβRIII shedding mutants in normal human mammary epithelial cells (HMECs) (Supp. Figure 8).

We also evaluated the effects of altered TβRIII ectodomain shedding on MDA-MB-231 cell invasion via Matrigel-coated transwell invasion assays. TGFβ-mediated invasion was significantly inhibited in both the WT-TβRIII and SS-TβRIII expressing cells (Figure 5C,D). In contrast, compared to EV, there was an increase in both basal and TGF-β-mediated invasion in Δshed-TβRIII expressing cells (Figure 5C,D). Together, these data demonstrate that ectodomain shedding is required for TβRIII-mediated inhibition of TGF-β induced breast cancer cell migration and invasion.

## Discussion

Here we have demonstrated that mutating the juxtamembrane region of T $\beta$ RIII can alter its ectodomain shedding, and that inhibiting production of soluble T $\beta$ RIII results in increased TGF- $\beta$  responsiveness, increased duration of TGF- $\beta$  signaling, and abrogation of T $\beta$ RIII's ability to inhibit TGF- $\beta$ -mediated migration and invasion.

Ectodomain shedding of transmembrane proteins is a common phenomenon that often contributes to regulation of signal transduction. Ligands and growth factors, including TGF- $\alpha$ , can be activated for autocrine signaling by release from the membrane (Teixido et al., 1990), and cell-surface signaling receptor levels can be altered to either increase or decrease cellular responsiveness. Recent studies demonstrated that the type I TGF- $\beta$  receptor is released from the membrane by TACE, resulting in decreased TGF- $\beta$  signaling (Liu et al., 2009). Following this shedding event, a secondary  $\gamma$ -secretase cleavage releases the intracellular domain (ICD) of T $\beta$ RI, which can then accumulate in the nucleus and interact with transcriptional regulators to alter TGF- $\beta$ -induced gene transcription and subsequent tumor cell invasion (Mu et al., 2011). In addition, it was recently reported that T $\beta$ RIII is also a substrate for  $\gamma$ -secretase cleavage and that its ICD is stable after this event (Blair et al., 2011); however, it is still unknown whether the ICD is involved in downstream signal transduction. If the T $\beta$ RIII-ICD functions similarly to the T $\beta$ RI-ICD, it will be interesting to determine whether any of the alterations in signaling and biology reported here are regulated by increased or decreased activity of the ICD resulting from the  $\Delta$ shed- or super-shed-T $\beta$ RIII mutation.

While we have established discrete mutations in the T $\beta$ RIII juxtamembrane region that regulate T $\beta$ RIII shedding, we have not elucidated how these mutations result in increased or decreased ectodomain shedding. The M9 NAAIRS mutation and M742A substitution could

decrease shedding either by disrupting a potential metalloprotease consensus sequence, or by altering the structure of T $\beta$ RIII, so that it is unable to physically interact with or be recognized as a substrate by the appropriate proteases. Knowledge regarding the precise site of endogenous T $\beta$ RIII cleavage and structural information regarding the extracellular domain of T $\beta$ RIII would both be useful in determining how these alterations regulate T $\beta$ RIII shedding. We used the protease specificity prediction server (PROSPER) to perform *in silico* analysis of the T $\beta$ RIII juxtamembrane domain sequence (Song et al., 2012). The region containing the M9 NAAIRS mutant revealed several potential cleavage sites at A740, M741 and M742 by MMP3, MMP9 and cathepsin, suggesting that the M9 and M742A mutants could be disrupting these recognition sequences. The region containing the NAAIRS M13-M15 mutants, which increased T $\beta$ RIII ectodomain shedding, is highly proline-rich. Due to the unique biochemical and structural properties of proline, mutating this region may alter the structure of the extracellular domain of T $\beta$ RIII to make it more accessible to an endogenous, constitutive sheddase. Indeed, while there were no protease consensus sites within the M13-M15 region, when the M13 super-shedder sequence containing the NAAIRS substitution was queried in the PROSPER software, two novel consensus sites for MMP9 and elastase were introduced at that site. Whether these proteases are responsible for shedding T $\beta$ RIII is currently being explored.

As we and others have demonstrated an important role for T $\beta$ RIII and soluble T $\beta$ RIII in regulating breast cancer progression, both through effects on breast cancer cells (Sun and Chen, 1997; Dong et al., 2007), as well as effects on the tumor microenvironment, including the local immune response (Hanks et al., 2013) and angiogenesis (Bandyopadhyay et al., 1999; Dong et al., 2007), understanding the regulation and mechanism of T $\beta$ RIII shedding and how this process might be altered during cancer progression could yield insight into targeting TGF- $\beta$  signaling in

cancer patients. While T $\beta$ RIII does not appear to be a substrate of the canonical ectodomain shedding machinery (Arribas et al., 1997), determining what factors do regulate T $\beta$ RIII shedding could be quite informative. Ectodomain shedding of other cell surface receptors can be activated by numerous triggers, including UV irradiation, inflammation, and growth factor stimulation (Killock and Ivetic, 2010; Seo et al., 2007). In addition to decreased T $\beta$ RIII expression in human cancers, the balance of cell-surface and soluble T $\beta$ RIII could be altered by aberrant processes or signaling within the tumor that potentially could be targeted therapeutically. The current studies suggest that increasing T $\beta$ RIII ectodomain shedding and soluble T $\beta$ RIII levels could be beneficial in reducing the pro-tumorigenic effects of TGF- $\beta$  in established cancers. Indeed, receptor trap molecules based partially on soluble T $\beta$ RIII have been described (Verona et al., 2008) and could be developed for this indication.

In addition to TGF- $\beta$  ligands, T $\beta$ RIII binds other TGF- $\beta$  superfamily members, including multiple BMPs, and can enhance binding of these ligands to signaling receptors (Kirkbride et al., 2008). Studies using the shedding mutants defined here demonstrate that soluble T $\beta$ RIII is able to sequester BMP and reduce downstream signaling and BMP-mediated biology, while  $\Delta$ shed-T $\beta$ RIII enhances BMP-mediated signaling and biology (Gatza and Blobe, unpublished data). These studies suggest that T $\beta$ RIII ectodomain shedding plays a critical role in regulating BMP signaling as well as TGF- $\beta$ . Future studies will determine whether soluble and cell-surface T $\beta$ RIII have differential effects on other T $\beta$ RIII binding proteins, including inhibin and bFGF.

TGF- $\beta$  levels are frequently elevated in human breast cancers (Ghellal et al., 2000), and most human breast cancers become resistant to the antiproliferative effects of TGF- $\beta$ , despite an intact core signaling pathway (Riggins et al., 1997). These data support an important role for the TGF- $\beta$  signaling pathway in mammary carcinogenesis. Accordingly, there are currently several

strategies being explored for targeting TGF- $\beta$  signaling in breast cancer patients (Connolly et al., 2012). However, the highly contextual nature and dichotomous functions of TGF- $\beta$  signaling during breast cancer progression suggest that further definition of this pathway is required to safely and effectively target the TGF- $\beta$  signaling pathway. As we have demonstrated that there is increased TGF- $\beta$  responsiveness when ectodomain shedding is inhibited, our work suggests that anti-TGF- $\beta$  therapies may be more effective on tumors with a low ratio of soluble/cell-surface T $\beta$ RIII. Understanding the distinct roles of soluble and membrane-bound T $\beta$ RIII and how they interact to regulate TGF- $\beta$ -mediated signaling and biology at different ratios will be useful when considering using TGF- $\beta$ -targeted therapies for cancer and other diseases. The work presented here contributes to this understanding by defining differential effects of a low vs. high ratio of soluble T $\beta$ RIII/cell-surface T $\beta$ RIII on TGF- $\beta$  signaling and TGF- $\beta$ -mediated migration and invasion in breast cancer cells.

### **Acknowledgements**

This work was supported in part by NIH Grant R01-CA136786 (GCB), Komen for the Cure Grant SAC100002 (GCB), DoD BCRP Predoctoral Fellowship BC-093966 (JLE) and R01-CA136786S1 (JLE). Experiments were performed by JLE, CEG and MS.

## References:

- Andres, J.L., D. DeFalcis, M. Noda, and J. Massague. 1992. Binding of two growth factor families to separate domains of the proteoglycan betaglycan. *The Journal of biological chemistry*. 267:5927-5930.
- Arribas, J., and A. Borroto. 2002. Protein ectodomain shedding. *Chem Rev*. 102:4627-4638.
- Arribas, J., F. Lopez-Casillas, and J. Massague. 1997. Role of the juxtamembrane domains of the transforming growth factor-alpha precursor and the beta-amyloid precursor protein in regulated ectodomain shedding. *The Journal of biological chemistry*. 272:17160-17165.
- Bandyopadhyay, A., Y. Zhu, and L.B. Cibull. 1999. A soluble transforming growth factor b type III receptor suppresses tumorigenicity and metastasis of human breast MDA-MB-231 cells. *Cancer research*. 59:5041-5046.
- Bernabeu, C., J.M. Lopez-Novoa, and M. Quintanilla. 2009. The emerging role of TGF-beta superfamily coreceptors in cancer. *Biochim Biophys Acta*. 1792:954-973.
- Blair, C.R., J.B. Stone, and R.G. Wells. 2011. The type III TGF-beta receptor betaglycan transmembrane-cytoplasmic domain fragment is stable after ectodomain cleavage and is a substrate of the intramembrane protease gamma-secretase. *Biochim Biophys Acta*. 1813:332-339.
- Cheifetz, S., H. Hernandez, M. Laiho, P. ten Dijke, K.K. Iwata, and J. Massague. 1990. Distinct transforming growth factor-beta (TGF-beta) receptor subsets as determinants of cellular responsiveness to three TGF-beta isoforms. *The Journal of biological chemistry*. 265:20533-20538.
- Connolly, E.C., J. Freimuth, and R.J. Akhurst. 2012. Complexities of TGF-beta targeted cancer therapy. *International journal of biological sciences*. 8:964-978.
- De Crescenzo, G., C.S. Hinck, Z. Shu, J. Zuniga, J. Yang, Y. Tang, J. Baardsnes, V. Mendoza, L. Sun, F. Lopez-Casillas, M. O'Connor-McCourt, and A.P. Hinck. 2006. Three key residues underlie the differential affinity of the TGFbeta isoforms for the TGFbeta type II receptor. *J Mol Biol*. 355:47-62.
- Dong, M., T. How, K.C. Kirkbride, K.J. Gordon, J.D. Lee, N. Hempel, P. Kelly, B.J. Moeller, J.R. Marks, and G.C. Blobe. 2007. The type III TGF-beta receptor suppresses breast cancer progression. *The Journal of clinical investigation*. 117:206-217.
- Elliott, R.L., and G.C. Blobe. 2005. Role of transforming growth factor Beta in human cancer. *J Clin Oncol*. 23:2078-2093.
- Finger, E.C., R.S. Turley, M. Dong, T. How, T.A. Fields, and G.C. Blobe. 2008. TbetaRIII suppresses non-small cell lung cancer invasiveness and tumorigenicity. *Carcinogenesis*. 29:528-535.
- Ghellal, A., C. Li, M. Hayes, G. Byrne, N. Bundred, and S. Kumar. 2000. Prognostic significance of TGF beta 1 and TGF beta 3 in human breast carcinoma. *Anticancer Res*. 20:4413-4418.
- Hamad, N.M., S.S. Banik, and C.M. Counter. 2002. Mutational analysis defines a minimum level of telomerase activity required for tumorigenic growth of human cells. *Oncogene*. 21:7121-7125.
- Hanks, B.A., A. Holtzhausen, K.S. Evans, R. Jamieson, P. Gimpel, O.M. Campbell, M. Hector-Greene, L. Sun, A. Tewari, A. George, M. Starr, A. Nixon, C. Augustine, G.

- Beasley, D.S. Tyler, T. Osada, M.A. Morse, L. Ling, H.K. Lyerly, and G.C. Blobe. 2013. Type III TGF-beta receptor downregulation generates an immunotolerant tumor microenvironment. *The Journal of clinical investigation*.
- Killock, D.J., and A. Ivetic. 2010. The cytoplasmic domains of TNFalpha-converting enzyme (TACE/ADAM17) and L-selectin are regulated differently by p38 MAPK and PKC to promote ectodomain shedding. *Biochem J*. 428:293-304.
- Kirkbride, K.C., T.A. Townsend, M.W. Bruinsma, J.V. Barnett, and G.C. Blobe. 2008. Bone morphogenetic proteins signal through the transforming growth factor-beta type III receptor. *The Journal of biological chemistry*. 283:7628-7637.
- Lambert, K.E., H. Huang, K. Mythreye, and G.C. Blobe. 2011. The type III transforming growth factor-beta receptor inhibits proliferation, migration, and adhesion in human myeloma cells. *Molecular biology of the cell*. 22:1463-1472.
- Lewis, K.A., P.C. Gray, A.L. Blount, L.A. MacConell, E. Wiater, L.M. Bilezikjian, and W. Vale. 2000. Betaglycan binds inhibin and can mediate functional antagonism of activin signalling. *Nature*. 404:411-414.
- Liu, C., P. Xu, S. Lamouille, J. Xu, and R. Derynck. 2009. TACE-mediated ectodomain shedding of the type I TGF-beta receptor downregulates TGF-beta signaling. *Mol Cell*. 35:26-36.
- Lopez-Casillas, F., S. Cheifetz, J. Doody, J.L. Andres, W.S. Lane, and J. Massague. 1991. Structure and expression of the membrane proteoglycan betaglycan, a component of the TGF-beta receptor system. *Cell*. 67:785-795.
- Lopez-Casillas, F., H.M. Payne, J.L. Andres, and J. Massague. 1994. Betaglycan can act as a dual modulator of TGF-beta access to signaling receptors: mapping of ligand binding and GAG attachment sites. *J Cell Biol*. 124:557-568.
- Lopez-Casillas, F., J.L. Wrana, and J. Massague. 1993. Betaglycan presents ligand to the TGF beta signaling receptor. *Cell*. 73:1435-1444.
- Massague, J. 2008. TGFbeta in Cancer. *Cell*. 134:215-230.
- Mooradian, D.L., J.B. McCarthy, K.V. Komanduri, and L.T. Furcht. 1992. Effects of transforming growth factor-beta 1 on human pulmonary adenocarcinoma cell adhesion, motility, and invasion in vitro. *J Natl Cancer Inst*. 84:523-527.
- Mu, Y., R. Sundar, N. Thakur, M. Ekman, S.K. Gudey, M. Yakymovych, A. Hermansson, H. Dimitriou, M.T. Bengochea-Alonso, J. Ericsson, C.H. Heldin, and M. Landstrom. 2011. TRAF6 ubiquitinates TGFbeta type I receptor to promote its cleavage and nuclear translocation in cancer. *Nature communications*. 2:330.
- Mythreye, K., and G.C. Blobe. 2009. The type III TGF-beta receptor regulates epithelial and cancer cell migration through beta-arrestin2-mediated activation of Cdc42. *Proceedings of the National Academy of Sciences of the United States of America*. 106:8221-8226.
- Perez-Torres, M., B.L. Valle, N.J. Maihle, L. Negron-Vega, R. Nieves-Alicea, and E.M. Cora. 2008. Shedding of epidermal growth factor receptor is a regulated process that occurs with overexpression in malignant cells. *Experimental cell research*. 314:2907-2918.
- Riggins, G.J., K.W. Kinzler, B. Vogelstein, and S. Thiagalingam. 1997. Frequency of Smad gene mutations in human cancers. *Cancer research*. 57:2578-2580.

- Seo, M., M.J. Lee, J.H. Heo, Y.I. Lee, Y. Kim, S.Y. Kim, E.S. Lee, and Y.S. Juhn. 2007. G Protein betagamma subunits augment UVB-induced apoptosis by stimulating the release of soluble heparin-binding epidermal growth factor from human keratinocytes. *The Journal of biological chemistry*. 282:24720-24730.
- Siegel, P.M., and J. Massague. 2003. Cytostatic and apoptotic actions of TGF-beta in homeostasis and cancer. *Nat Rev Cancer*. 3:807-821.
- Siegel, R., D. Naishadham, and A. Jemal. 2012. Cancer statistics, 2012. *CA: a cancer journal for clinicians*. 62:10-29.
- Song, J., H. Tan, A.J. Perry, T. Akutsu, G.I. Webb, J.C. Whisstock, and R.N. Pike. 2012. PROSPER: an integrated feature-based tool for predicting protease substrate cleavage sites. *PLoS One*. 7:e50300.
- Sun, L., and C. Chen. 1997. Expression of transforming growth factor beta type III receptor suppresses tumorigenicity of human breast cancer MDA-MB-231 cells. *The Journal of biological chemistry*. 272:25367-25372.
- Teixido, J., S.T. Wong, D.C. Lee, and J. Massague. 1990. Generation of transforming growth factor-alpha from the cell surface by an O-glycosylation-independent multistep process. *The Journal of biological chemistry*. 265:6410-6415.
- Turley, R.S., E.C. Finger, N. Hempel, T. How, T.A. Fields, and G.C. Blobe. 2007. The type III transforming growth factor-beta receptor as a novel tumor suppressor gene in prostate cancer. *Cancer research*. 67:1090-1098.
- Velasco-Loyden, G., J. Arribas, and F. Lopez-Casillas. 2004. The shedding of betaglycan is regulated by pervanadate and mediated by membrane type matrix metalloprotease-1. *The Journal of biological chemistry*. 279:7721-7733.
- Verona, E.V., Y. Tang, T.K. Millstead, A.P. Hinck, J.K. Agyin, and L.-Z. Sun. 2008. Expression, purification and characterization of BGERII: a novel pan-TGF  $\beta$  inhibitor. *Protein Engineering Design and Selection*. 21:463-473.
- Wang, X.F., H.Y. Lin, E. Ng-Eaton, J. Downward, H.F. Lodish, and R.A. Weinberg. 1991. Expression cloning and characterization of the TGF-beta type III receptor. *Cell*. 67:797-805.



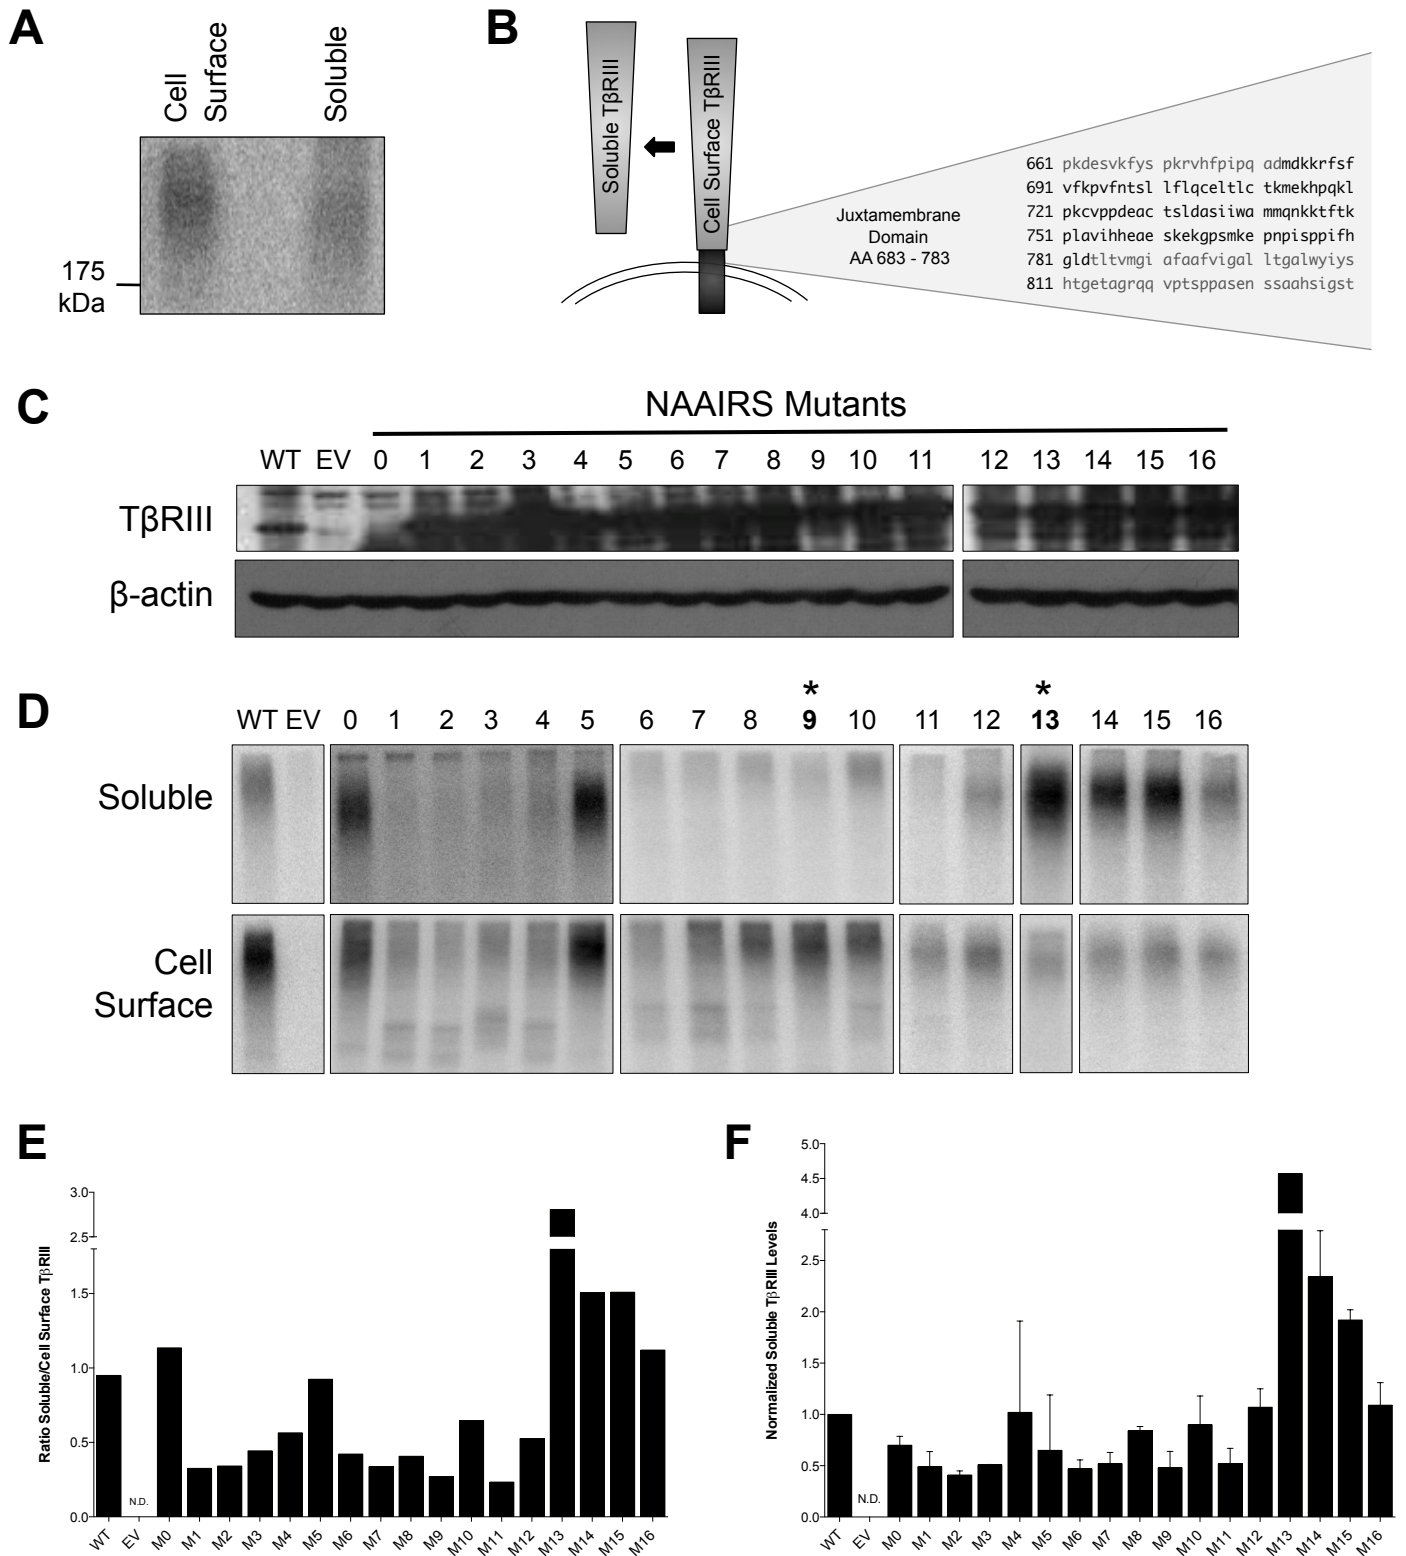

**Figure 1: Mutations in the juxtamembrane domain of TβRIII alter ectodomain shedding.** (A) Binding and crosslinking of transiently transfected HA tagged WT-TβRIII in COS7 cells. Following <sup>125</sup>I-TGF-β1 binding and crosslinking, cell lysate and conditioned media were immunoprecipitated with an antibody against HA. (B) Schematic of TβRIII with the amino acid sequence of the juxtamembrane domain. (C) Western blot of WT-TβRIII and indicated NAAIRS mutants transiently transfected in COS7 cells. EV, empty vector. β-actin was used as a loading control. (D) Binding and crosslinking of COS7 cells transiently transfected with the indicated constructs. Cells were grown in full growth media for 20 h. Following <sup>125</sup>I-TGF-β1 binding and crosslinking, cell lysates and conditioned media were immunoprecipitated with an antibody against HA. \* denotes the mutants that were further utilized in these studies. Representative images from 2 independent experiments. (E) Quantification of (D). Densitometric analysis was performed in ImageJ software, and the ratio of soluble/cell-surface TβRIII was determined. (F) ELISA analysis of soluble TβRIII from COS7 cells transiently transfected with the indicated constructs. Media were conditioned for 24 h. Concentration of soluble TβRIII was determined from a standard curve. Soluble TβRIII levels were then normalized to TβRIII expression determined via western blotting from control lysates. Data are from 2 independent experiments and shown as mean ± SEM normalized to WT-TβRIII.

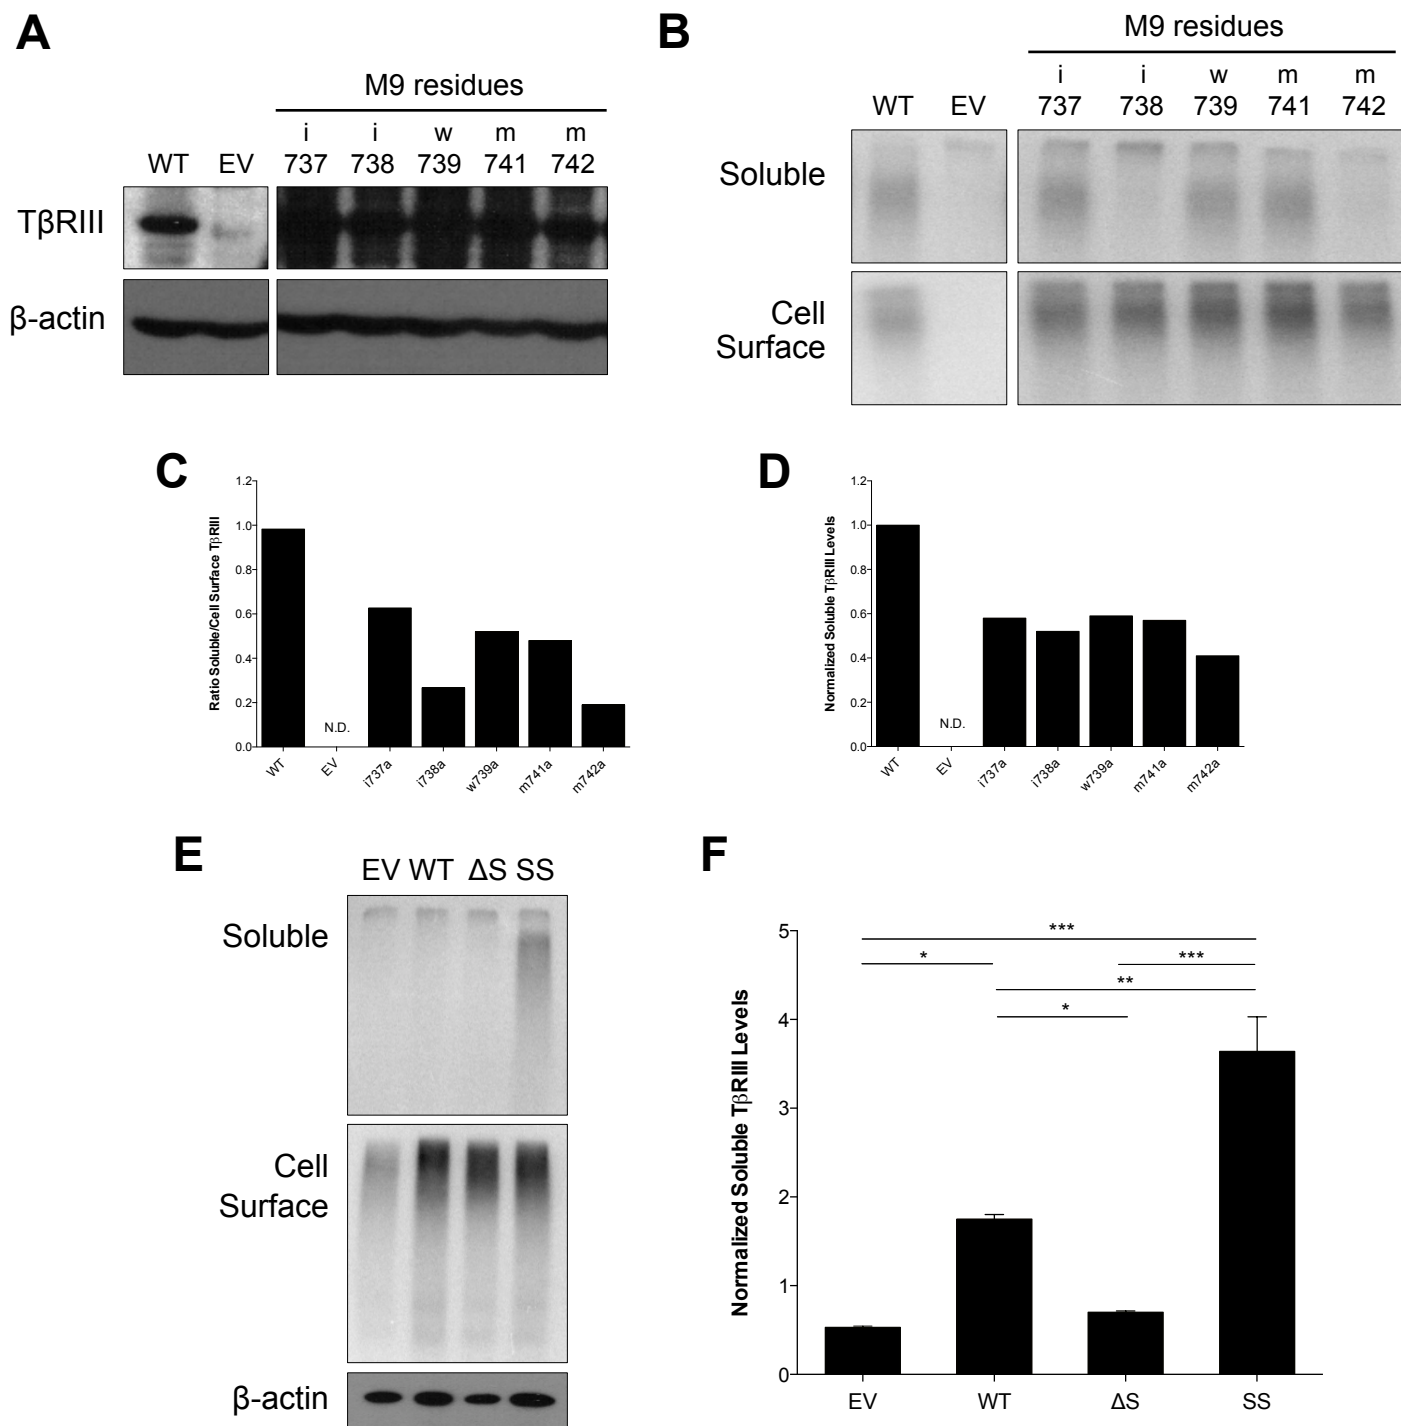

**Figure 2:** A single amino acid substitution at M742 significantly inhibits ectodomain shedding. (A) Western blot showing expressing of WT-TβRIII and M9 alanine point mutants transiently transfected in COS7 cells. β-actin was used as a loading control. (B) Binding and crosslinking of COS7 cells transiently transfected with the indicated constructs. Cells were grown in full growth media for 20 h. Following <sup>125</sup>I-TGF-β1 binding and crosslinking, cell lysates and conditioned media were immunoprecipitated with an antibody against HA. Representative images from 2 independent experiments. (C) Quantification of (B). Densitometric analysis was performed in ImageJ software, and the ratio of soluble/cell-surface TβRIII was determined. (D) ELISA analysis of soluble TβRIII from COS7 cells transiently transfected with the indicated constructs. Media were conditioned for 24 h. Concentration of soluble TβRIII was determined from a standard curve. Soluble TβRIII levels were then normalized to TβRIII expression determined via western blotting from control lysates. Representative data from 2 independent experiments. (E) Binding and crosslinking of monoclonal stable lentiviral MDA-MB-231 cell lines made with EV, WT-TβRIII, Δshed-TβRIII (M9 mutant) or super-shed TβRIII (M13 mutant). Following <sup>125</sup>I-TGF-β1 binding and crosslinking, cell lysates and conditioned media were immunoprecipitated with an antibody against the extracellular domain of TβRIII. β-actin was used as a loading control. Representative data from 3 independent experiments. (F) ELISA analysis of soluble TβRIII from stable MDA-MB-231 cell lines. Media were conditioned for 24 h. Concentration of soluble TβRIII was determined from a standard curve of known amounts. Soluble TβRIII levels were then normalized to β-actin expression determined via western blotting from control lysates. Data are from 3 independent experiments and shown as mean ± SEM. One-way ANOVA  $p < 0.0001$ . Tukey's multiple comparisons tests: \*  $p < 0.05$ ; \*\*  $p < 0.001$ ; \*\*\*  $p < 0.0001$ .

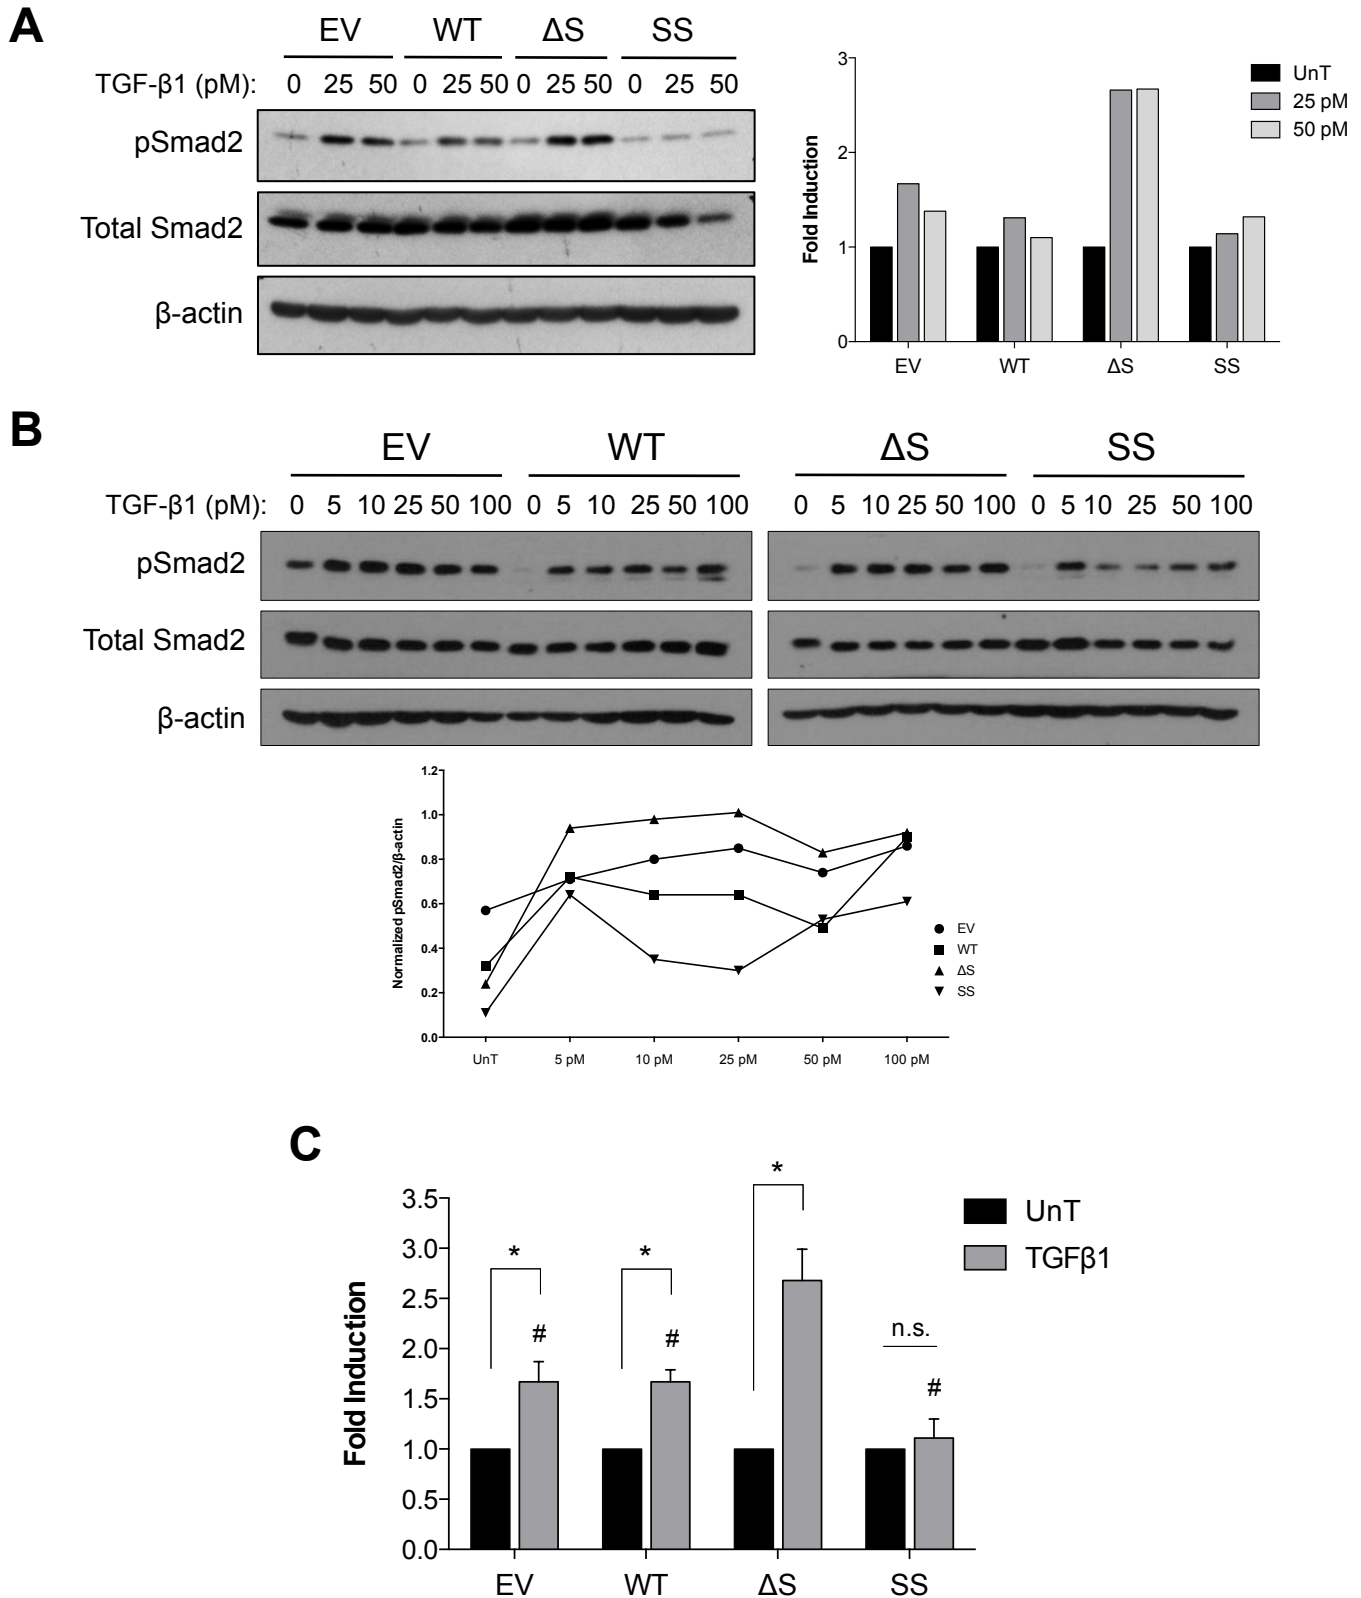

**Figure 3: Effects of altered *TBR111* ectodomain shedding on TGF- $\beta$  signaling.** (A,B) Lentiviral stable MDA-MB-231 cell lines expressing either EV, WT-T $\beta$ RIII,  $\Delta$ shed-T $\beta$ RIII or super-shed T $\beta$ RIII were plated in full serum media and allowed to condition for 20 h before treatment with the indicated concentrations of TGF- $\beta$ 1 for 30 minutes. Western blot analysis was performed with the indicated antibodies. Total Smad2 and  $\beta$ -actin were used as loading controls. Quantification of densitometric analysis shown as levels of phosphorylated Smad2/ $\beta$ -actin. Data are representative of  $\geq 3$  independent experiments. (C) Stable MDA-MB-231 cell lines were transfected with a pE2.1 responsive luciferase construct and a renilla construct. The following day cells were treated with serum-free media that had been pre-conditioned from the corresponding cell line for 24 h and 50 pM TGF- $\beta$ 1. Cells were treated for 24 h. Results from 4 independent experiments are shown as pE2.1/renilla activity, and normalized to ligand untreated condition of each cell line. Two-way ANOVA  $p < 0.001$ . \* One-sample  $t$ -test  $p < 0.05$ ; # Two-tailed  $t$ -test  $p < 0.05$  relative to  $\Delta$ S + TGF- $\beta$ 1.

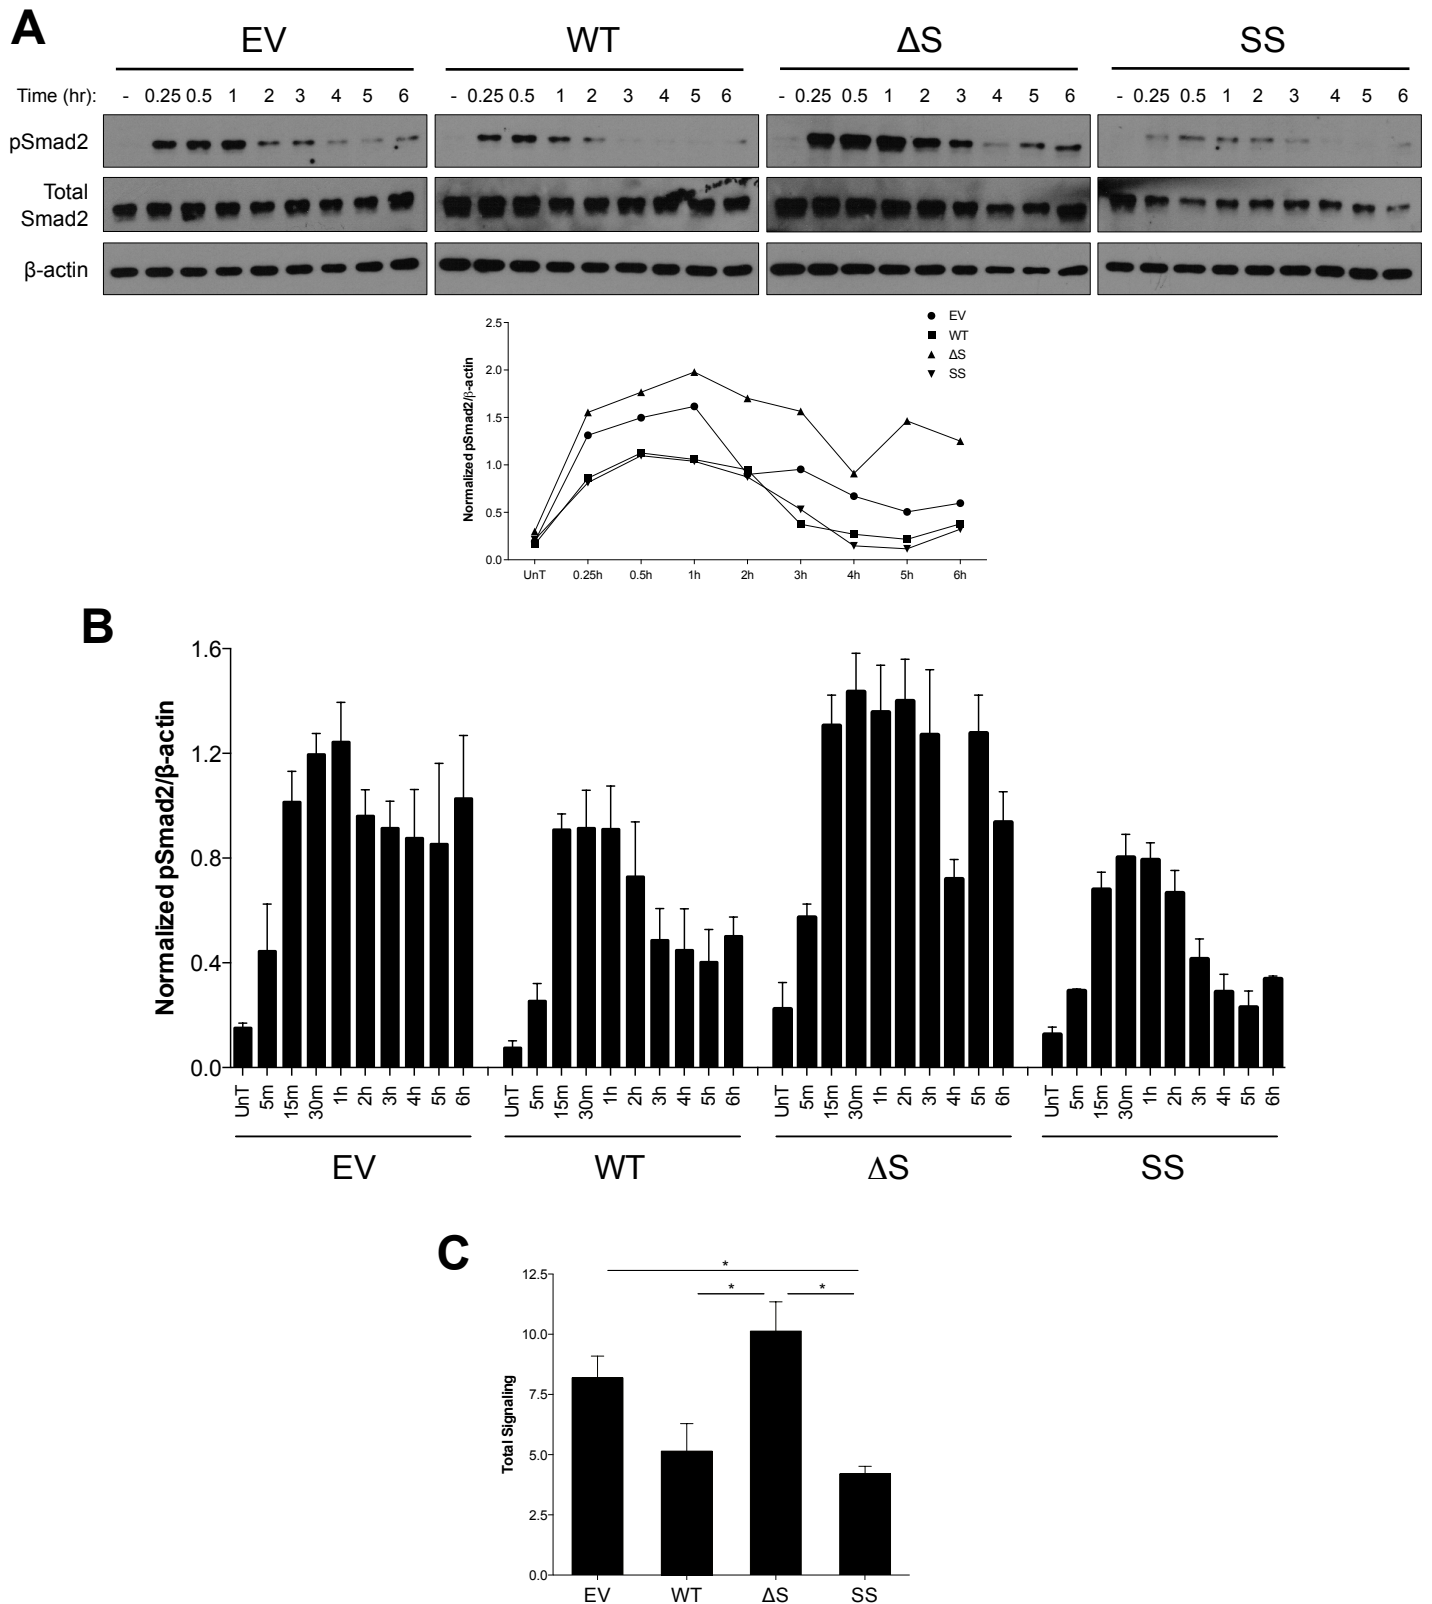

**Figure 4:** *TβRIII* ectodomain shedding regulates the kinetics and magnitude of TGF- $\beta$  signaling in MDA-MB-231 cells. (A) Lentiviral stable MDA-MB-231 cell lines expressing either EV, WT-T $\beta$ RIII,  $\Delta$ shed-T $\beta$ RIII or super-shed T $\beta$ RIII were plated in full serum media and allowed to condition for 20 h before treatment with 50 pM of TGF- $\beta$ 1 for the indicated times. Western blot analysis was performed with indicated antibodies. Total Smad2 and  $\beta$ -actin were used as loading controls. Quantification of densitometric analysis shown as levels of phosphorylated Smad2/ $\beta$ -actin is shown below. Representative data from 4 independent experiments. (B) Summary of time-course experiment data. Densitometric analysis of phosphorylated Smad2/ $\beta$ -actin. Data for  $\geq 3$  independent experiments for each time point shown as mean  $\pm$  SEM. One-way ANOVA  $p < 0.05$  for 15m, 30m, 1h, 2h, 3h, 4h, 5h, and 6h timepoints. (C) Integrated signaling over 6h time-course. Densitometric analysis of phosphorylated Smad2/ $\beta$ -actin of each experiment plotted as line graphs, and the area under the curve was calculated for each cell line. Data from 4 independent experiments shown as mean  $\pm$  SEM. One-way ANOVA  $p < 0.05$ . \* Two-tailed  $t$ -test  $p < 0.05$ .

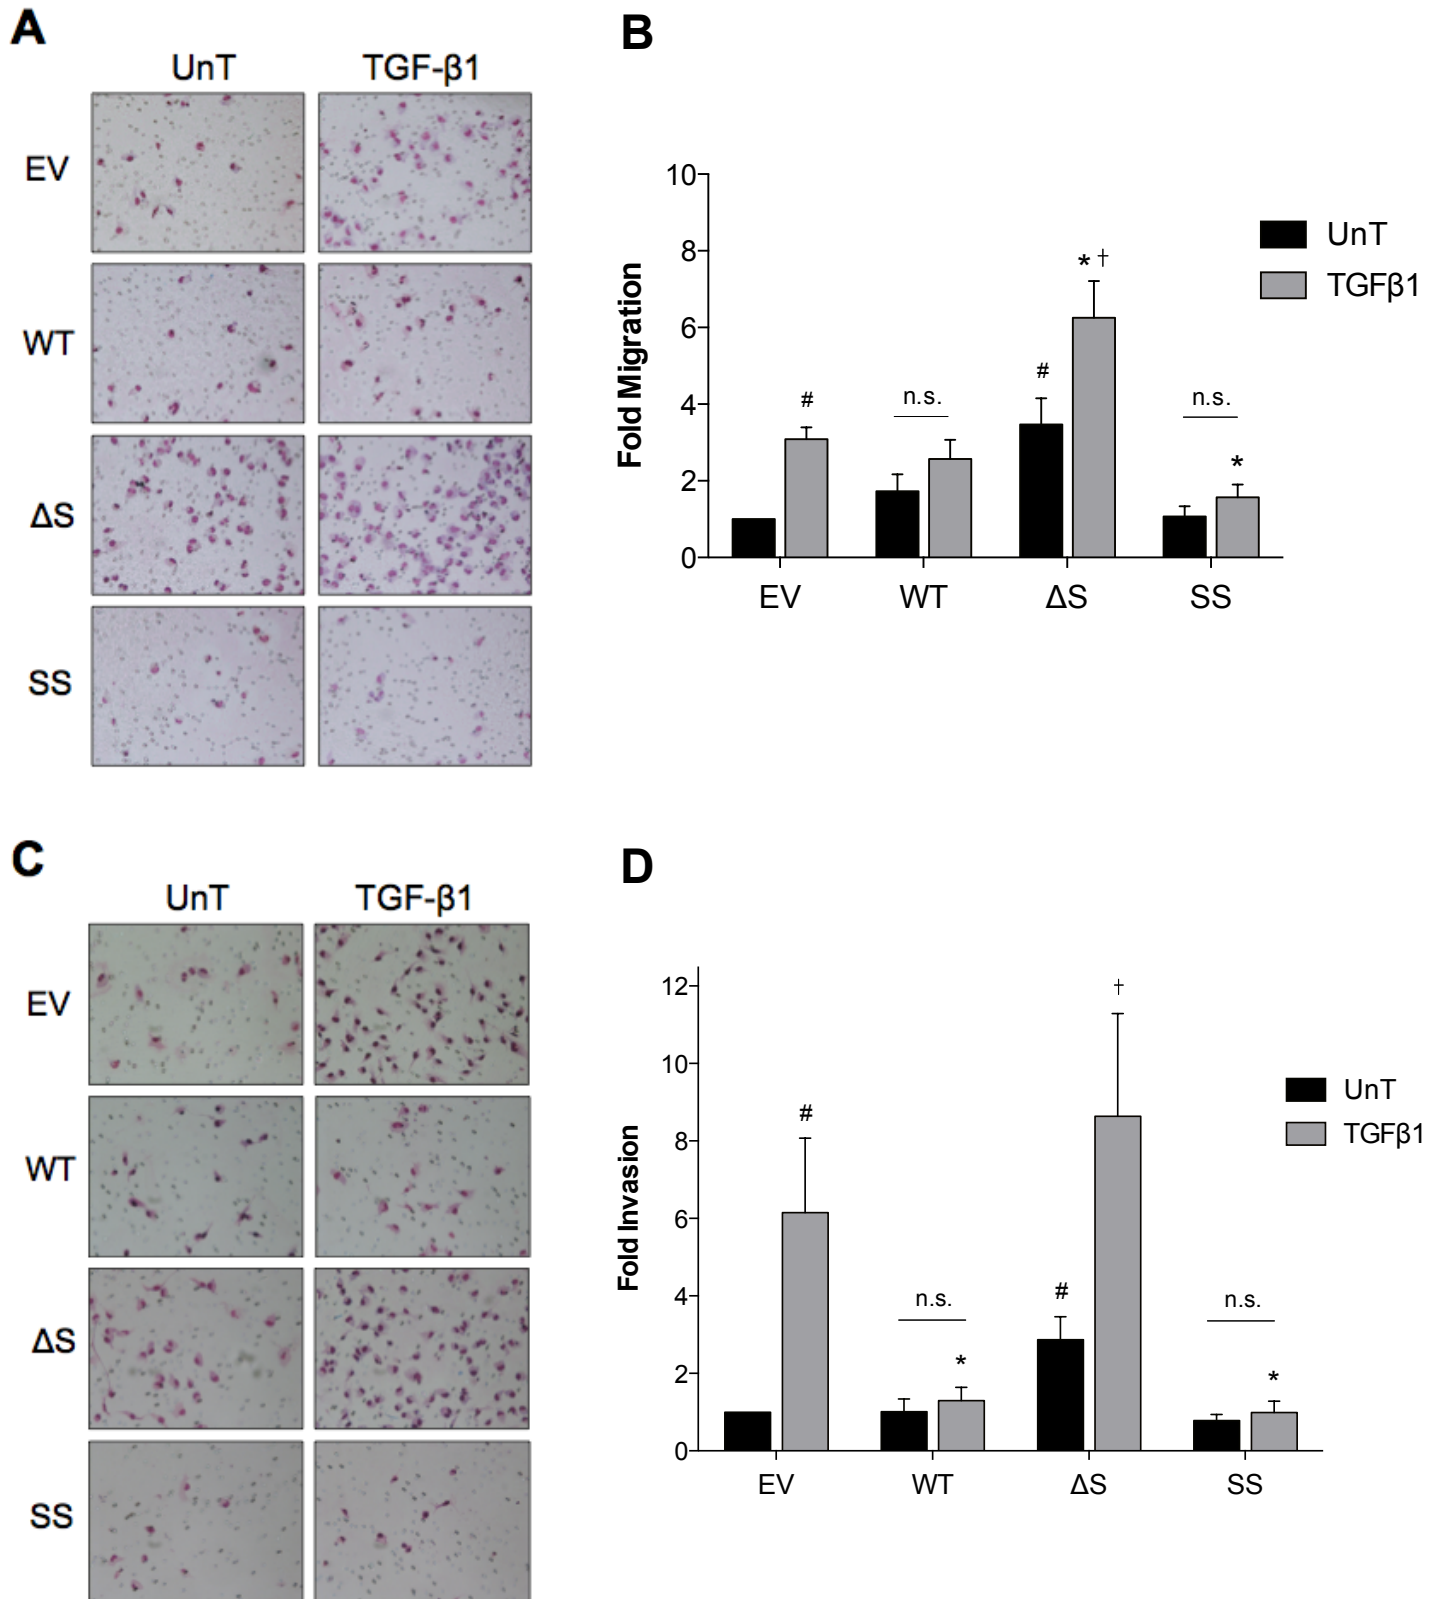

**Figure 5: Effects of altered TBR111 ectodomain shedding on TGF- $\beta$ -mediated migration and invasion.** Stable MDA-MB-231 cell lines were plated in media that had been pre-conditioned from the corresponding cell line for 24 h in (A,B) fibronectin coated transwell chambers or (C,D) Matrigel-coated transwell chambers in either the absence (UnT) or presence of 50 pM TGF- $\beta$ 1. Cells were allowed to migrate or invade for 24 h. (A) Representative images of migrated cells. (B) Summary of n=4 experiments. Data normalized to EV UnT and shown as mean  $\pm$  SEM. Two-way ANOVA for cell line and treatment  $p < 0.05$ . Tukey's multiple comparisons tests: #  $p < 0.05$  relative to EV UnT; \*  $p < 0.05$  relative to EV + TGF- $\beta$ 1; †  $p < 0.05$  relative to  $\Delta$ S UnT. (C) Representative images of invaded cells. (D) Summary of n=5 experiments. Data normalized to EV UnT and shown as mean  $\pm$  SEM. Two-way ANOVA for interaction, cell line and treatment  $p < 0.05$ . Tukey's multiple comparisons tests: #  $p < 0.05$  relative to EV UnT; \*  $p < 0.05$  relative to EV + TGF- $\beta$ 1; †  $p < 0.05$  relative to  $\Delta$ S UnT.

## Supplemental Table 1: Mutagenesis primers for T $\beta$ RIII NAAIRS mutants

| <i>Mutation:</i> | <i>Location:</i> | <i>Forward Primer Sequence:</i>                    | <i>Reverse Primer Sequence:</i>                   |
|------------------|------------------|----------------------------------------------------|---------------------------------------------------|
| M0               | AA 683-688       | cccgaagctgac aatgctgtatac gatcg cttgtcttcaagc      | gcttgaagacaaag cgatcgtatagcagcatt gtcagcttgccgg   |
| M1               | AA 689-694       | gataagaagcgattc aatgctgtatac gatcg gtcttcaacacc    | ggtgttgaagac cgatcgtatagcagcatt gaatcgcttctatc    |
| M2               | AA 695-700       | gtcttcaagcct aatgctgtatac gatcg ctctttctacag       | ctgtagaaagag cgatcgtatagcagcatt aggcttgaagac      |
| M3               | AA 701-706       | caacacctcactg aatgctgtatac gatcg ctgacgctgtgtacg   | cgtaacacagcgtcag cgatcgtatagcagcatt cagtgaaggtgtg |
| M4               | AA 707-712       | ctacagtgtgag aatgctgtatac gatcg atggagaagcacc      | ggtgcttctccat cgatcgtatagcagcatt ctacactgtag      |
| M5               | AA 713-718       | gctgtgtacgaag aatgctgtatac gatcg aagttgcctaag      | cttaggcaactt cgatcgtatagcagcatt ctctgtacacagc     |
| M6               | AA 719-724       | gaagcaccaccag aatgctgtatac gatcg cctcctgacgaagc    | gcttcctcaggagg cgatcgtatagcagcatt ctgggggtgcttc   |
| M7               | AA 725-730       | cctaagtgtgtg aatgctgtatac gatcg acctcgtggac        | gtccagcgagggt cgatcgtatagcagcatt cacacactagg      |
| M8               | AA 731-736       | gacgaagcctgc aatgctgtatac gatcg ataactctgggcc      | ggcccagattat cgatcgtatagcagcatt gcaggctctgc       |
| M9               | AA 737-742       | ctggacgcctcg aatgctgtatac gatcg cagaataagaag       | cttcttattctg cgatcgtatagcagcatt cgaggcgtccag      |
| M10              | AA 743-748       | ctgggccatgatg aatgctgtatac gatcg accaagccccttg     | caaggggcttggat cgatcgtatagcagcatt catcatggcccag   |
| M11              | AA 749-754       | gaagacgttc aatgctgtatac gatcg atccacatgaagc        | gcttcatggtggat cgatcgtatagcagcatt gaacgtcttc      |
| M12              | AA 755-760       | ccccttctgtg aatgctgtatac gatcg tctaaagaaaaagg      | ctttttctttaga cgatcgtatagcagcatt cacagcaagggg     |
| M13*             | AA 761-766       | * Made by Mutagenex                                |                                                   |
| M14              | AA 767-772       | gaaaaaggtcca aatgctgtatac gatcg ccaatttctccacc     | ggtggagaaattgg cgatcgtatagcagcatt tggaccttttc     |
| M15              | AA 773-778       | gaaggaaccaaat aatgctgtatac gatcg ttccatggctgtg     | ccagaccatggaa cgatcgtatagcagcatt atttggttccttc    |
| M16              | AA 778-783       | ccaatttctccacca aatgctgtatac gatcg accctaaccgtgatg | catcacggtagggt cgatcgtatagcagcatt tgggtgagaaattgg |

## Supplemental Table 2: Mutagenesis primers for T $\beta$ RIII alanine mutants

| <i>Mutation:</i> | <i>Forward Primer Sequence:</i> | <i>Reverse Primer Sequence:</i> |
|------------------|---------------------------------|---------------------------------|
| s689a            | gaagcgattc gcc ttgtcttcaag      | cttgaagacaaa ggc gaatcgcttc     |
| f690a            | gcgattcagc gcc gtcttcaagcc      | ggcttgaagac ggc gctgaatcgc      |
| v691a            | gattcagctt gcc ttcaagcctg       | caggcttga ggc aaagctgaatc       |
| f692a            | cagcttctgc gcc aagcctgtcttc     | gaagacaggctt ggc gacaaagctg     |
| k693a            | gcttcttctc gcc cctgtcttcaac     | gttgaagacagg ggc gaagacaaaagc   |
| p694a            | cttgtcttcaag gcc gtcttcaaccc    | ggtgttgaagac ggc cttgaagacaaa   |
| v695a            | cttcaagcct gcc ttcaacacc        | ggtgttga ggc aggcttgaag         |
| f696a            | caagcctgtc gcc aacacctcac       | gtgaggtgtt ggc gacaggcttg       |
| n697a            | gcctgtcttc gcc acctcactgctc     | gagcagtgaggt ggc gaagacaggc     |
| t698a            | ctgtcttcaac gcc tctactgctc      | gagcagtg ggc gttgaagacag        |
| s699a            | gtcttcaacacc gcc ctgctcttctac   | gtagaaagagcag ggc ggtgttgaagac  |
| l700a            | cttcaacacctca gcc ctcttctacag   | ctgtagaaagag ggc tgaggtgttgaag  |
| i737a            | ctggacgcctcg gcc atctgggcatg    | catggcccagat ggc cgaggcgtccag   |
| i738a            | gacgcctcgata gcc tgggcatgatg    | catcatggcca ggc tctcaggcgtc     |
| w739a            | gcctcgataatc gcc gccatgatcag    | ctgcatcatggc ggc gattatcaggc    |
| m741a            | gataatctgggcc gcc atgcagaataag  | cttattctgcat ggc ggcccagattatc  |
| m742a            | ctgggcatg gcc cagaataagaag      | cttcttattctg ggc catggcccag     |
| t749a            | gaagacgttc gcc aagcccctgc       | gcaaggggctt ggc gaacgtcttc      |
| k750a            | gaagacgttacc gcc cccctgtctgtg   | cacagcaagggg ggc ggtgaacgtcttc  |
| p751a            | cgttaccaag gcc ctgtctgtgatc     | gatcacagcaag ggc ctgggtgaacg    |
| l752a            | caccaagccc gcc gctgtgatccac     | gtggatcacagc ggc gggcttgggt     |
| v754a            | caagcccctgtc gcc atccaccatgaag  | cttcatggtggat ggc agcaaggggcttg |

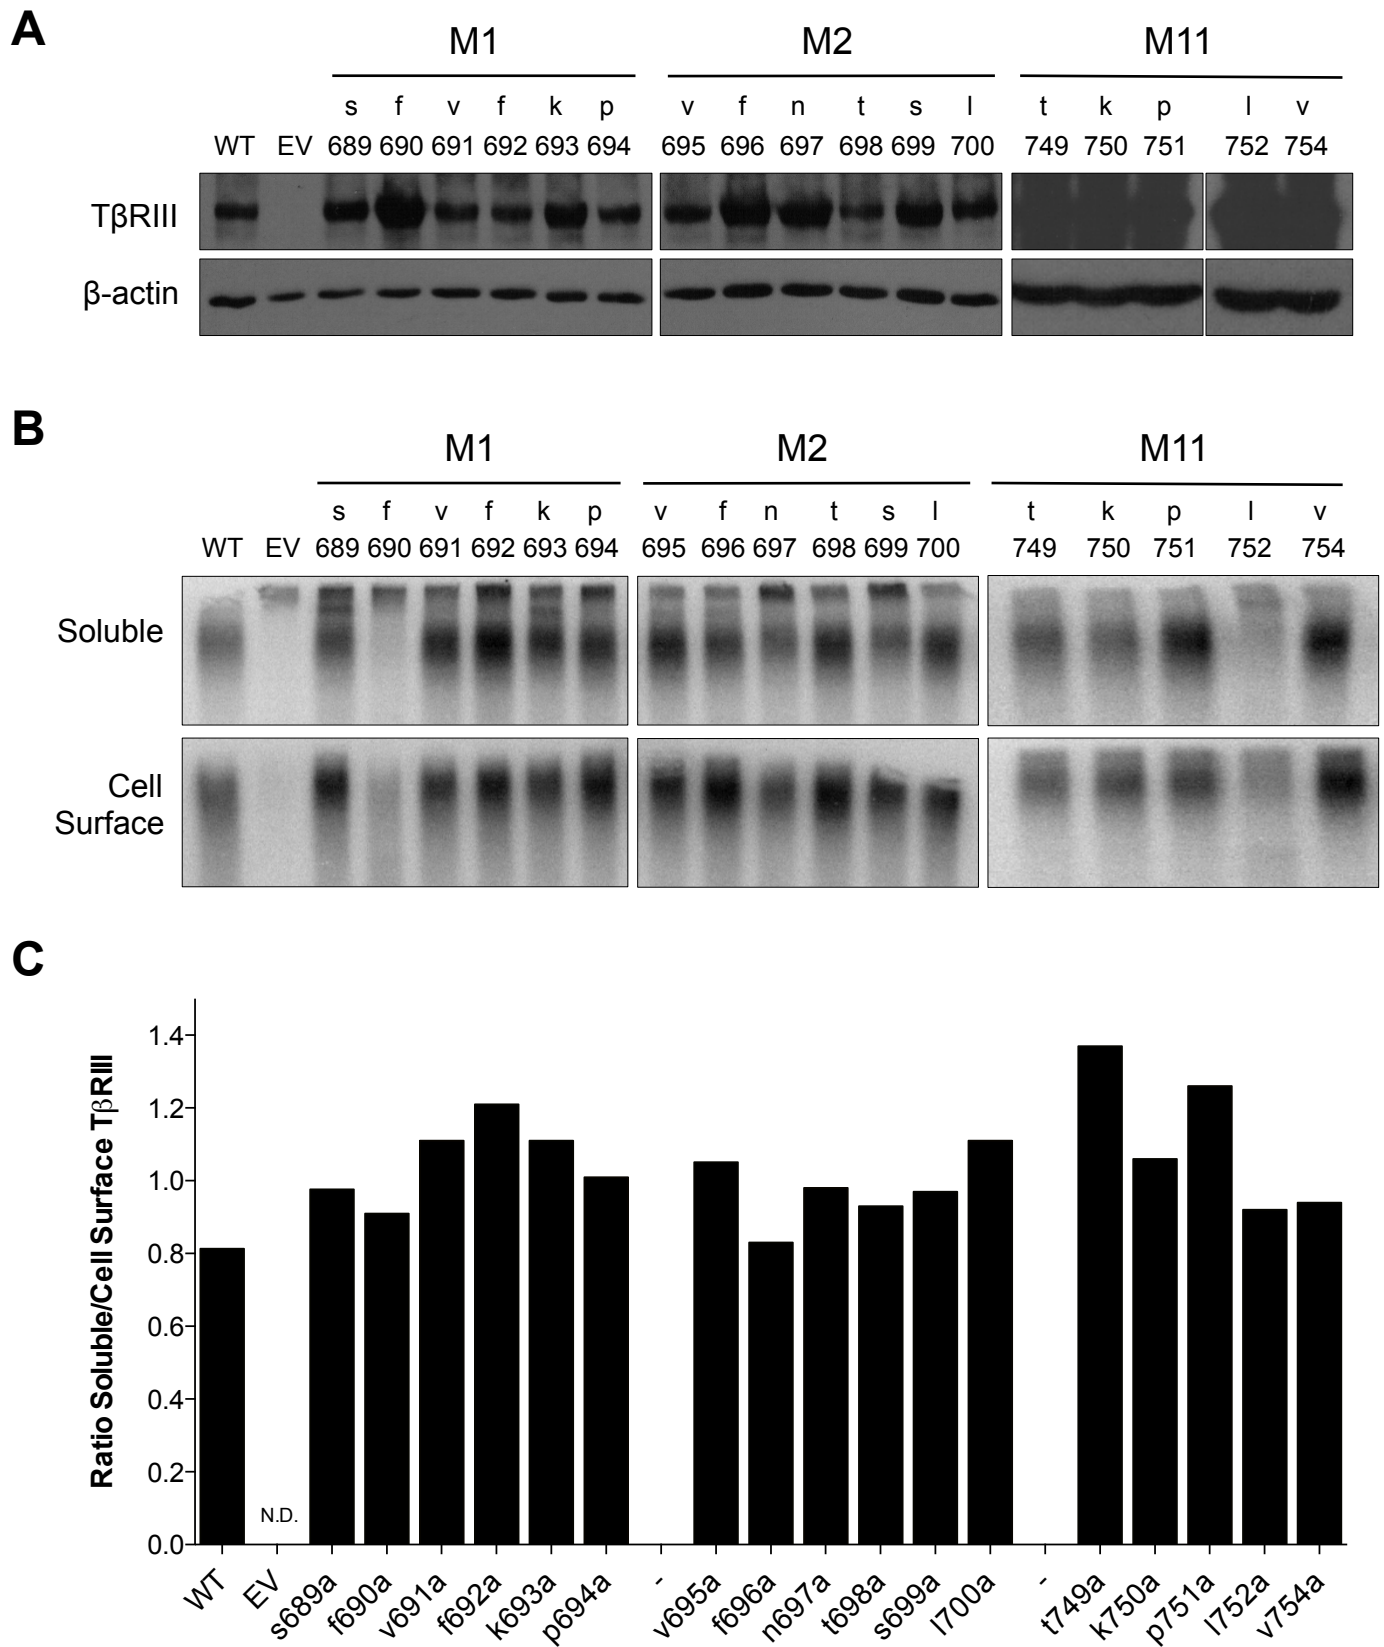

**Supplemental Figure 1: No single point mutations within M1, M2 or M11 significantly altered TβRIII ectodomain shedding.** (A) Western blot of transiently transfected WT-TβRIII or alanine mutants in COS7 cells. β-actin was used as a loading control. (B) Binding and crosslinking of transiently transfected WT-TβRIII or alanine mutants in COS7 cells. 24 h after transfection media was changed to full serum media and allowed to condition overnight. Following <sup>125</sup>I-TGF-β1 binding and crosslinking, lysates and conditioned media were immunoprecipitated with an antibody against HA. (C) Quantification of (B). Data shown as densitometry of soluble TβRIII/cell surface TβRIII. Representative image from 2 independent experiments.

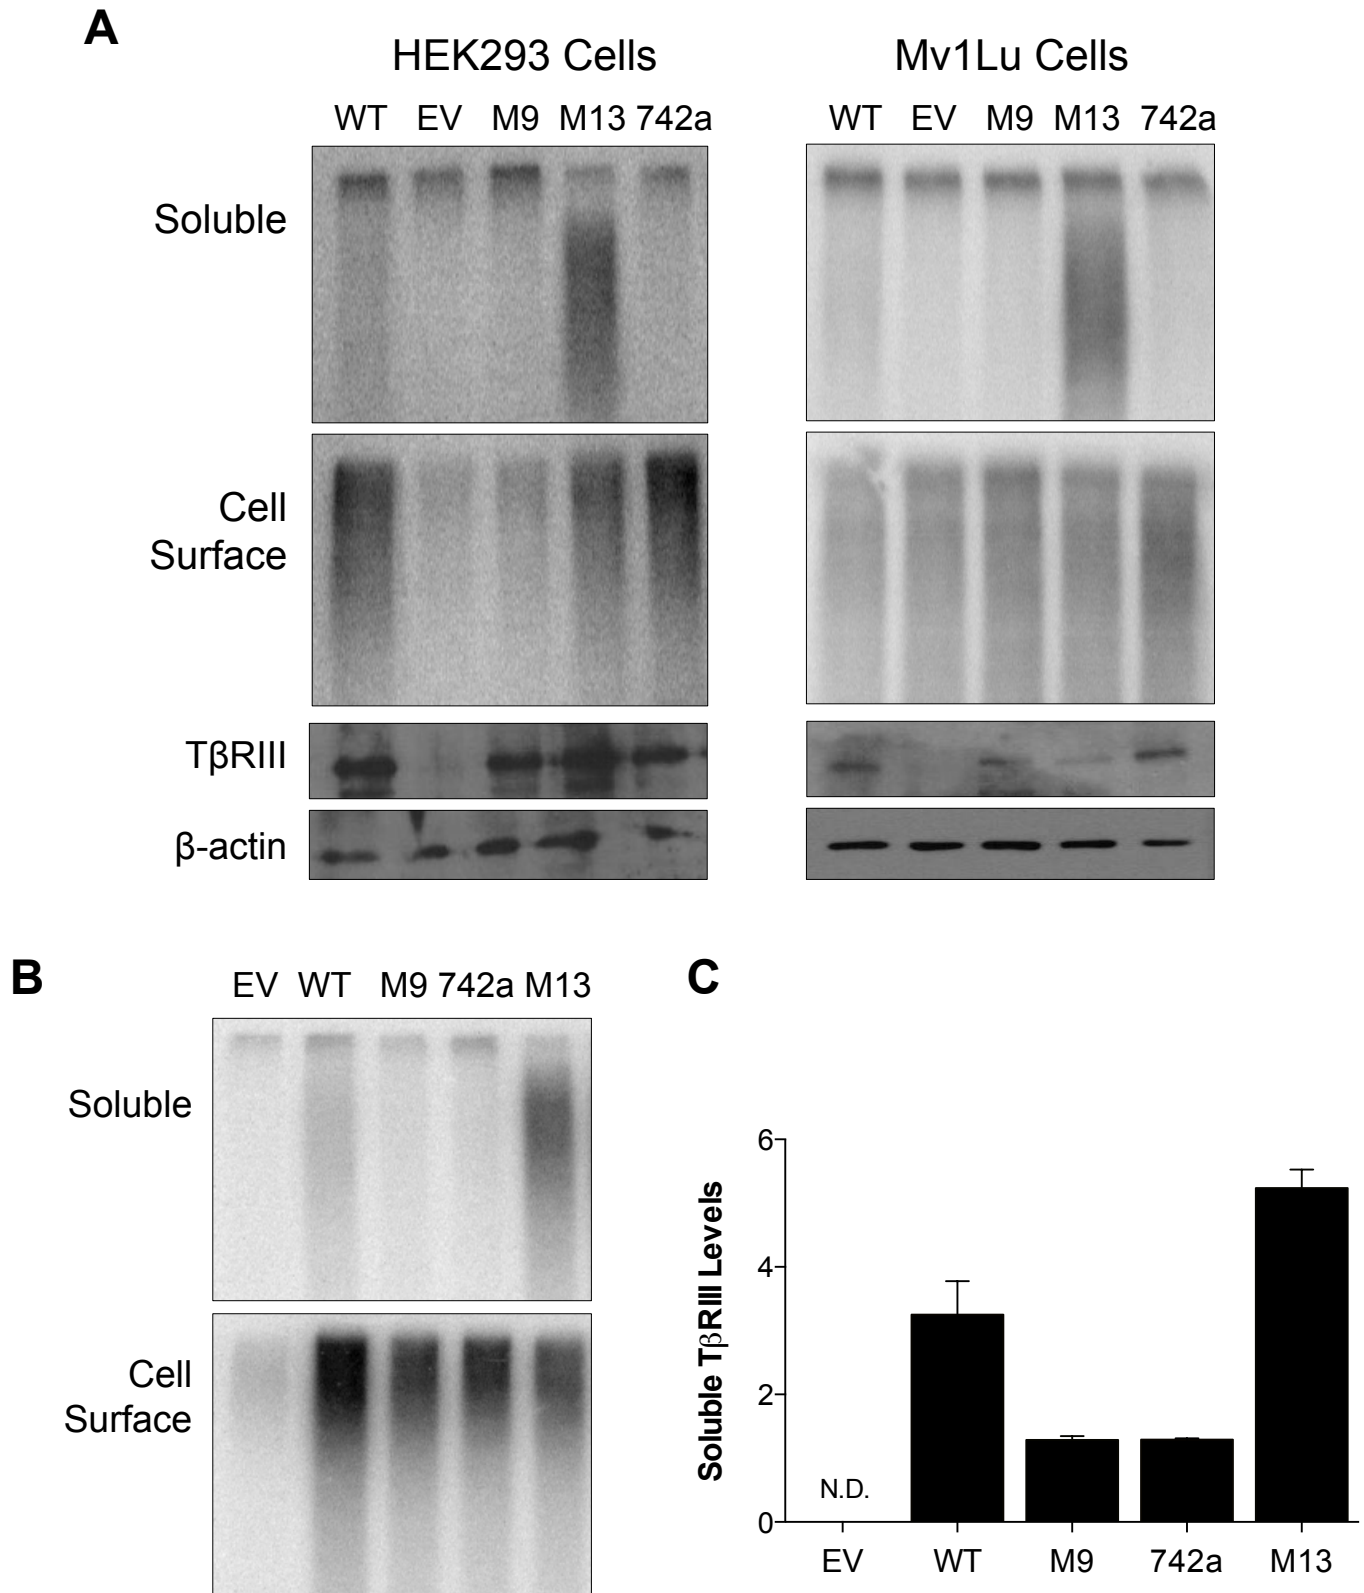

**Supplemental Figure 2: Alterations in TβRIII ectodomain shedding in shedding mutants is maintained in multiple cell lines.** (A) Binding and crosslinking of HEK293 and Mv1Lu cells. Cells were transiently transfected with EV, WT-TβRIII or shedding mutants and 24 h later media was replaced and allowed to condition for 20 h. Following <sup>125</sup>I-TGF-β1 binding and crosslinking, lysates and conditioned media were immunoprecipitated with an antibody against TβRIII. TβRIII and β-actin western blots shown as loading controls. Representative images from 2 independent experiments. (B) Binding and crosslinking of final shedding mutants in COS7 cells, performed as in (A). Representative images from 2 independent experiments. (C) ELISA data from media conditioned from transiently transfected COS7 cells for 20 h. Data from 3 independent experiments are shown as levels of soluble TβRIII in the conditioned media normalized to β-actin loading controls from the corresponding cell lysates.



**A**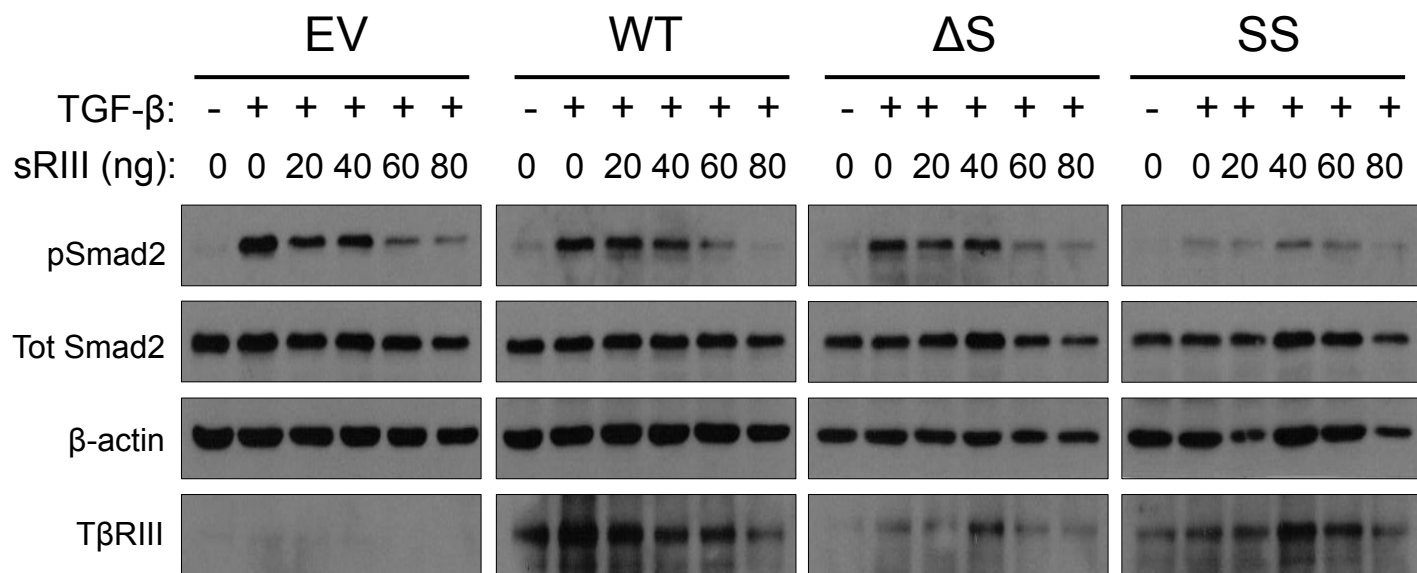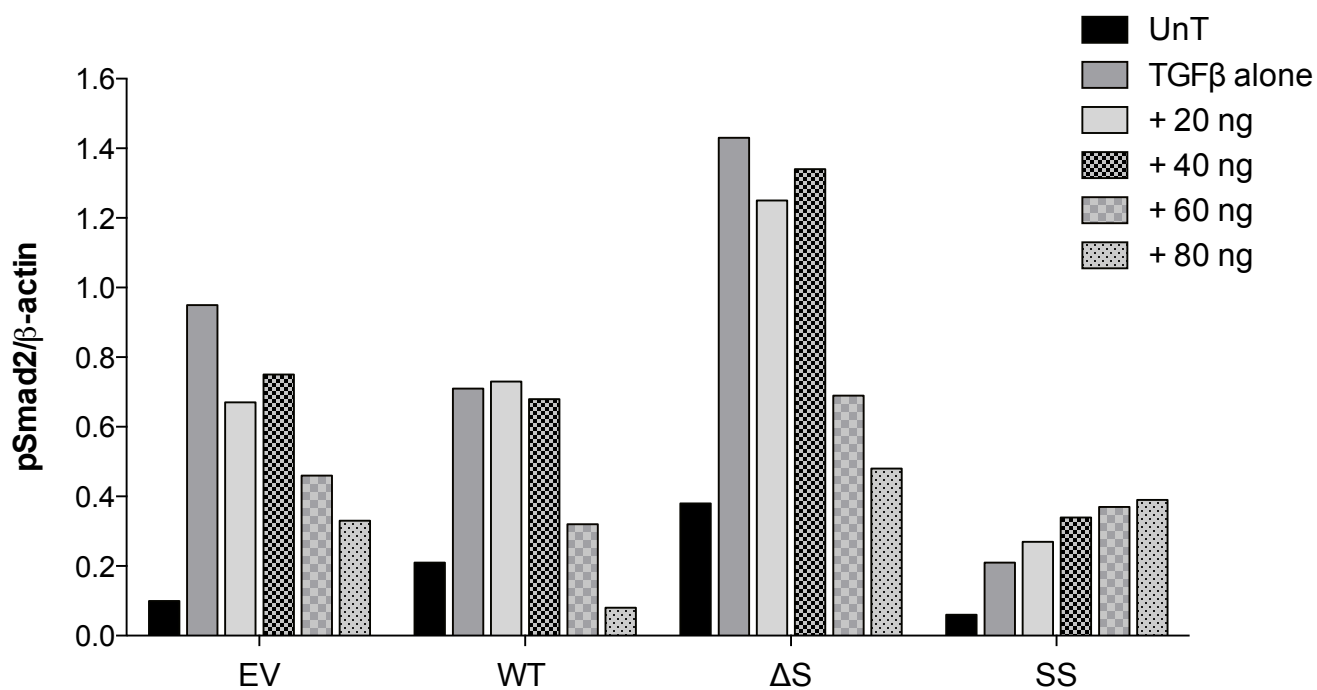

**Supplemental Figure 3: TGF- $\beta$  signaling is reduced by exogenous soluble T $\beta$ R111.** (A) Lentiviral stable MDA-MB-231 cell lines were plated in full serum media and allowed to condition for 20 h before treatment with 50 pM TGF- $\beta$ 1 and indicated amounts of exogenous soluble T $\beta$ R111 for 30 minutes. Western blot analysis performed with indicated antibodies. T $\beta$ R111 and  $\beta$ -actin western blots shown as loading controls. Representative image from 2 independent experiments. Densitometric analysis of pSmad2/ $\beta$ -actin control shown below.

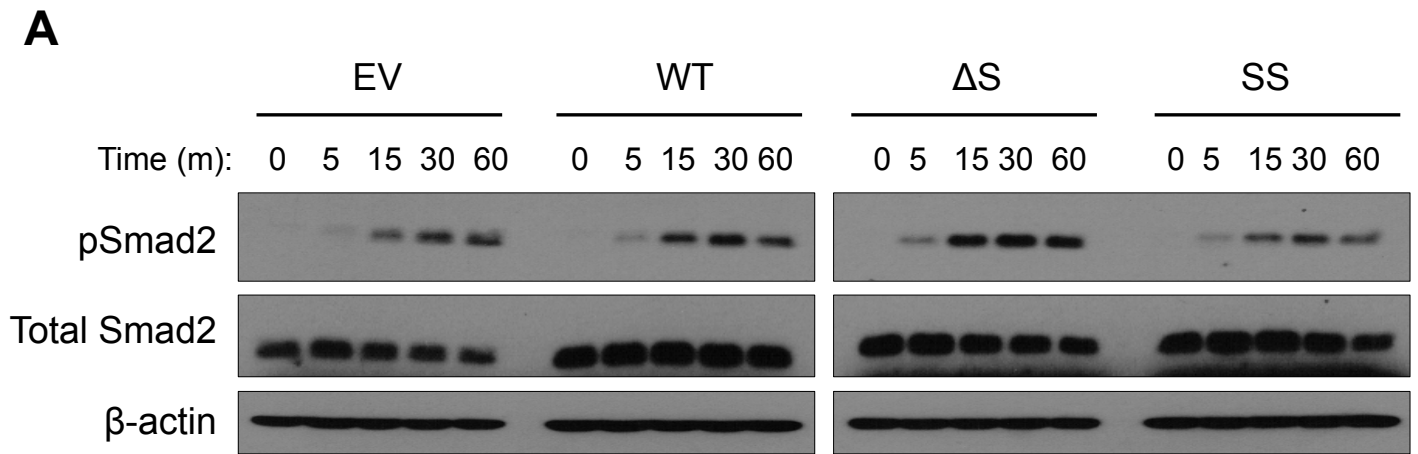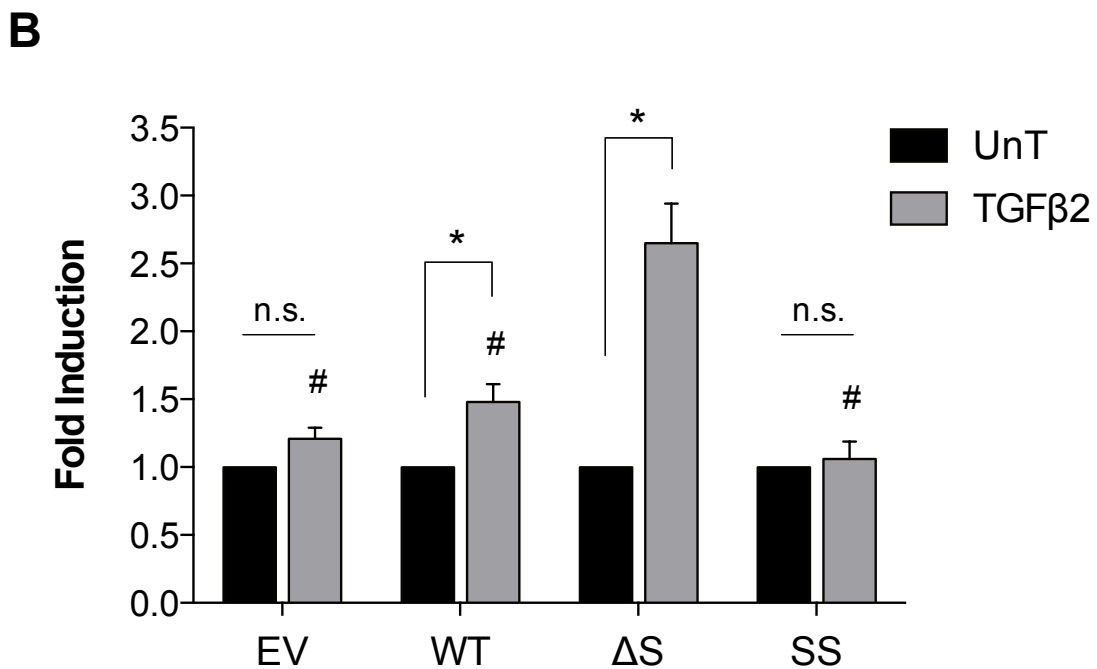

**Supplemental Figure 4: WT-TβRIII and ΔS-TβRIII sensitize MDA-MB-231 cells to TGF-β2.** (A) Lentiviral stable MDA-MB-231 cell lines were plated in full serum media and allowed to condition for 20 h before treatment with 50 pM TGF-β2 for the indicated time periods. Western blot analysis performed with indicated antibodies. Representative images from 2 independent experiments. (B) Stable MDA-MB-231 cell lines were transfected with a pE2.1 responsive luciferase construct and a renilla construct. The following day cells were treated with media that had been pre-conditioned from the corresponding cell line for 24 h and 50 pM TGF-β2. Cells were treated for 24 h. Results from 4 independent experiments are shown as pE2.1/renilla activity, and normalized to ligand untreated condition of each cell line. \* One-sample t-test  $p < 0.05$  relative to UnT. # Two-tailed  $t$ -test  $p < 0.05$  relative to ΔS + TGF-β2.

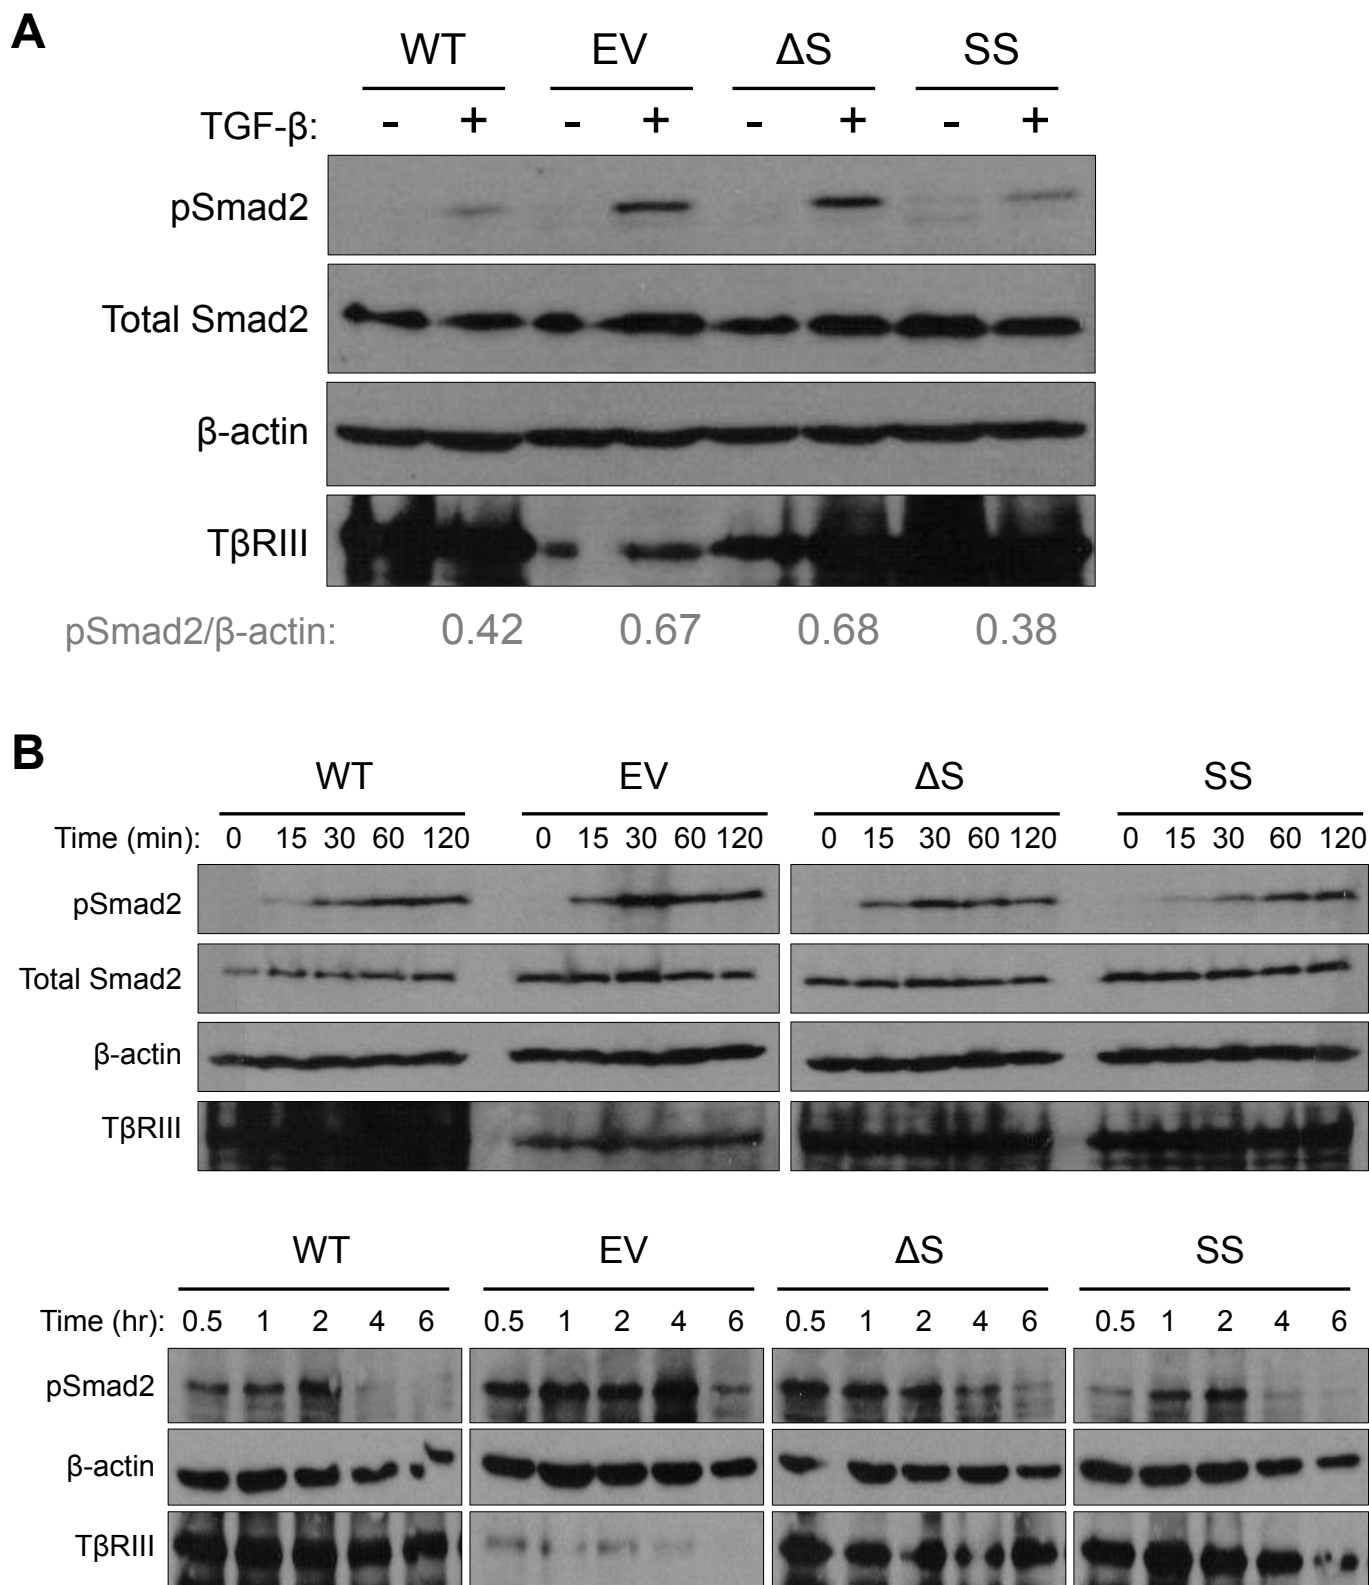

**Supplemental Figure 5:** *T $\beta$ RIII* ectodomain shedding regulates the kinetics and magnitude of TGF- $\beta$  signaling in HEK293 cells. HEK293 cells were transiently transfected with EV, WT-T $\beta$ RIII or shedding mutants. Following overnight serum starvation, cells were treated with (A) 50 pM TGF- $\beta$ 1 for 30 minutes or (B) 50 pM TGF- $\beta$ 1 for indicated time period. Western blot analysis performed with indicated antibodies. T $\beta$ RIII and  $\beta$ -actin western blots shown as loading controls. Representative images from 3 independent experiments shown.

**A**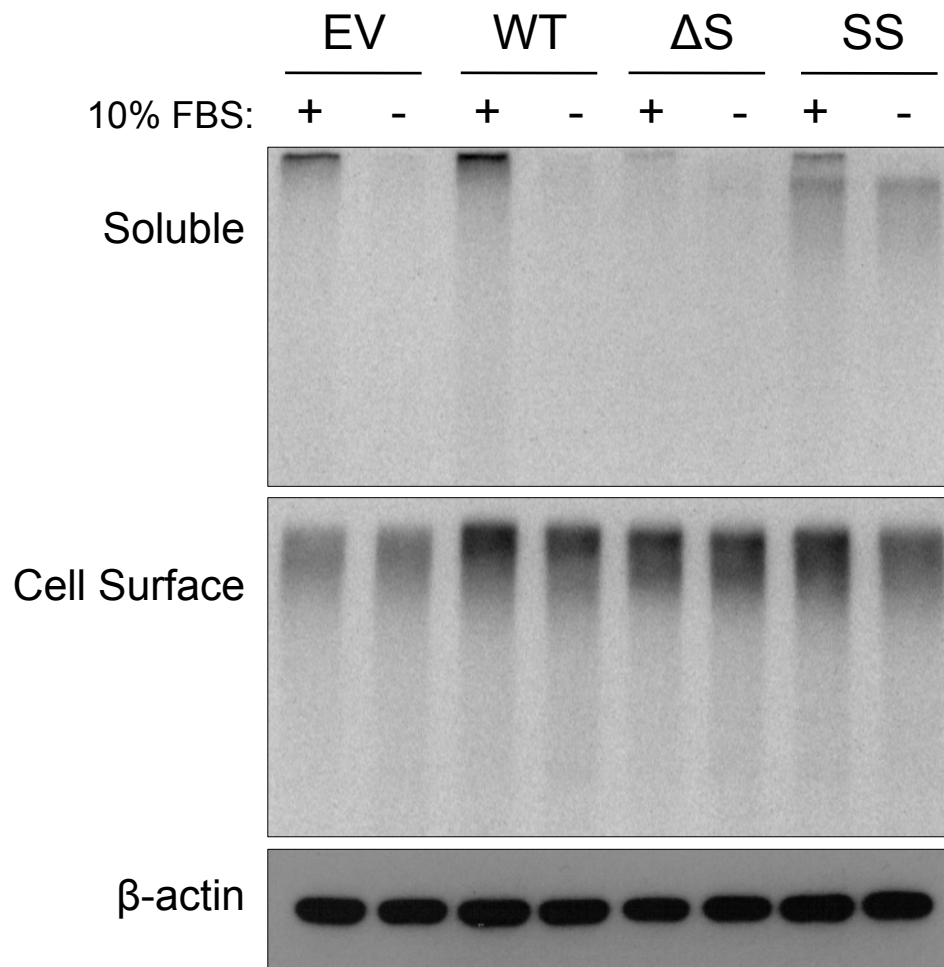**B**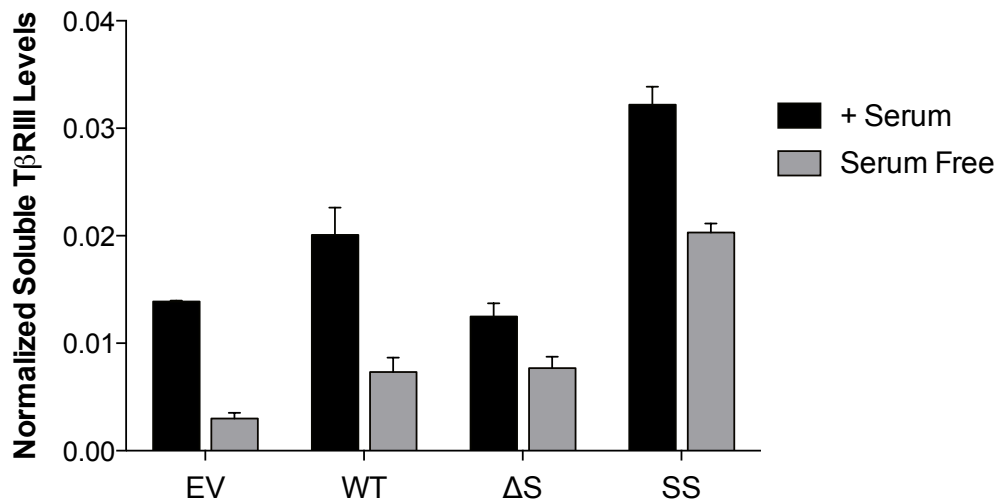

**Supplemental Figure 6:** *TβRIII* ectodomain shedding is affected by the presence of serum in MDA-MB-231 cells. (A) Binding and crosslinking of lentiviral stable MDA-MB-231 cell lines expressing either EV, WT-*TβRIII* or the shedding mutants. Cells were plated and the following day media was changed to either full serum media (10% FBS) or serum-free media and allowed to condition for 24 h. Following <sup>125</sup>I-TGF- $\beta$ 1 binding and crosslinking lysates and conditioned media were immunoprecipitated with an antibody against *TβRIII*.  $\beta$ -actin western blot shown as a loading control. Representative images from 2 independent experiments shown. (B) ELISA data from media conditioned from lentiviral stable cell lines for 24 h in the absence or presence of 10% FBS. Data from 3 independent experiments are shown as levels of soluble *TβRIII* in the conditioned media normalized to  $\beta$ -actin loading controls from the corresponding cell lysates. Two-way ANOVA for cell line and treatment  $p < 0.001$ .

**A**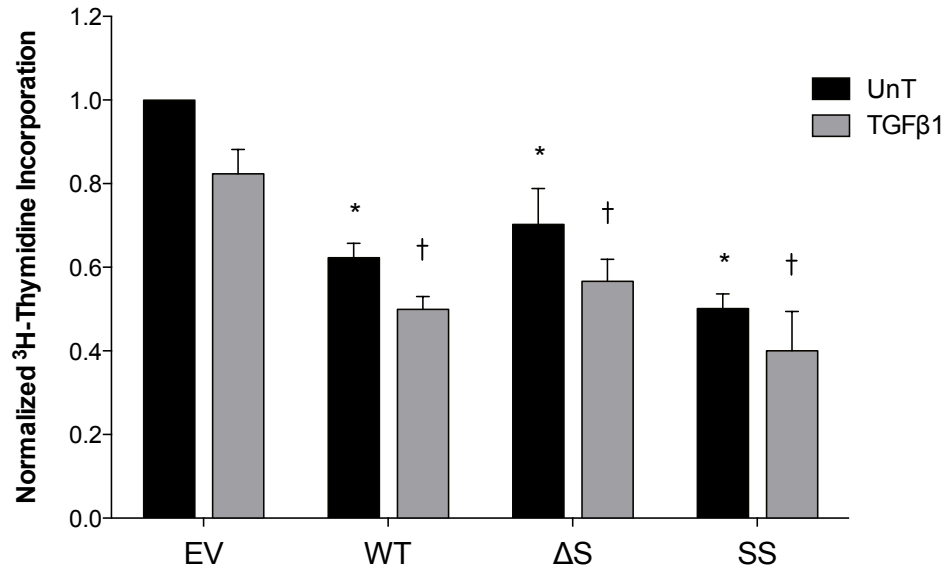

**Supplemental Figure 7: Effects of *TβRIII* and shedding mutants on proliferation at 24 hours.** (A) MDA-MB-231 lentiviral stable cell lines expressing either EV, WT-*TβRIII* or the shedding mutants were plated in media pre-conditioned for 24 h from corresponding cells in 96 well plates in triplicate in the absence or presence of 50 pM TGF-β1. 24 hours later proliferation was determined via <sup>3</sup>H-Thymidine incorporation. Data from 4 independent experiments are shown as CPM normalized to EV UnT. Two-way ANOVA for cell line  $p < 0.002$ . \* One-sample  $t$ -test  $p < 0.05$  relative to EV UnT. † Two-tailed  $t$ -test  $p < 0.05$  relative to EV + TGF-β1.

**A**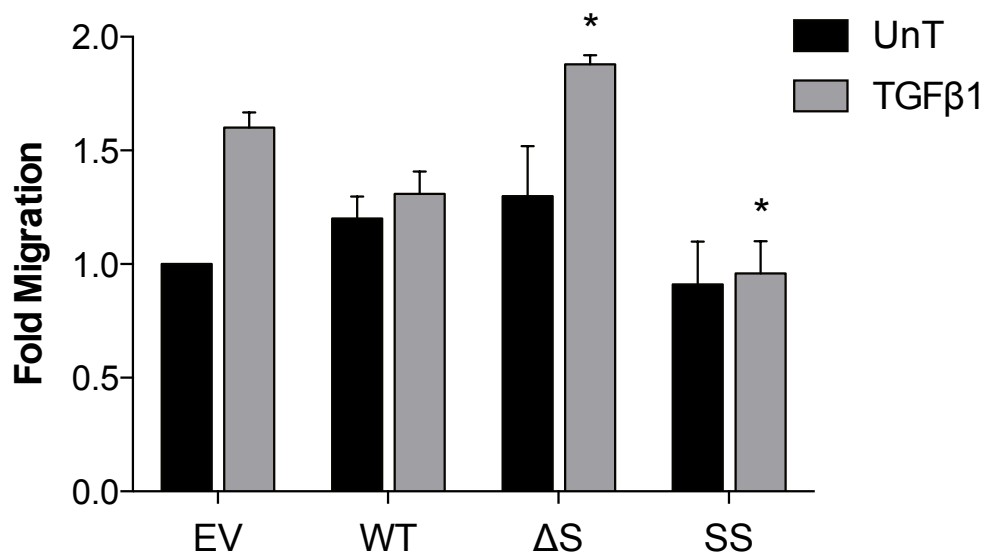

**Supplemental Figure 8: *TβRIII* ectodomain shedding regulates TGF-β-mediated migration in HMECs.** (A) Human Mammary Epithelial Cells (HMECs) transiently transfected with EV, WT-*TβRIII*, or the shedding mutants were plated onto fibronectin-coated transwells and allowed to migrate for 24 h in the absence or presence of 100 pM TGF-β1. Data from 3 independent experiments are shown as number of migrated cells normalized to EV UnT. \* Two-tailed  $t$ -test  $p < 0.05$  relative to EV + TGF-β1.
