# Supplementary figures and images for: The Balance of Cell Surface and Soluble Type III TGF-β Receptor Regulates BMP Signaling in Normal and Cancerous Mammary Epithelial Cells
Source: PubMed Central journal article supplement — Neoplasia. 2014 Jul 26;16(6):489–500. doi: 10.1016/j.neo.2014.05.008 (PMC4198744; doi:10.1016/j.neo.2014.05.008), 2014-07-26

Figure S1

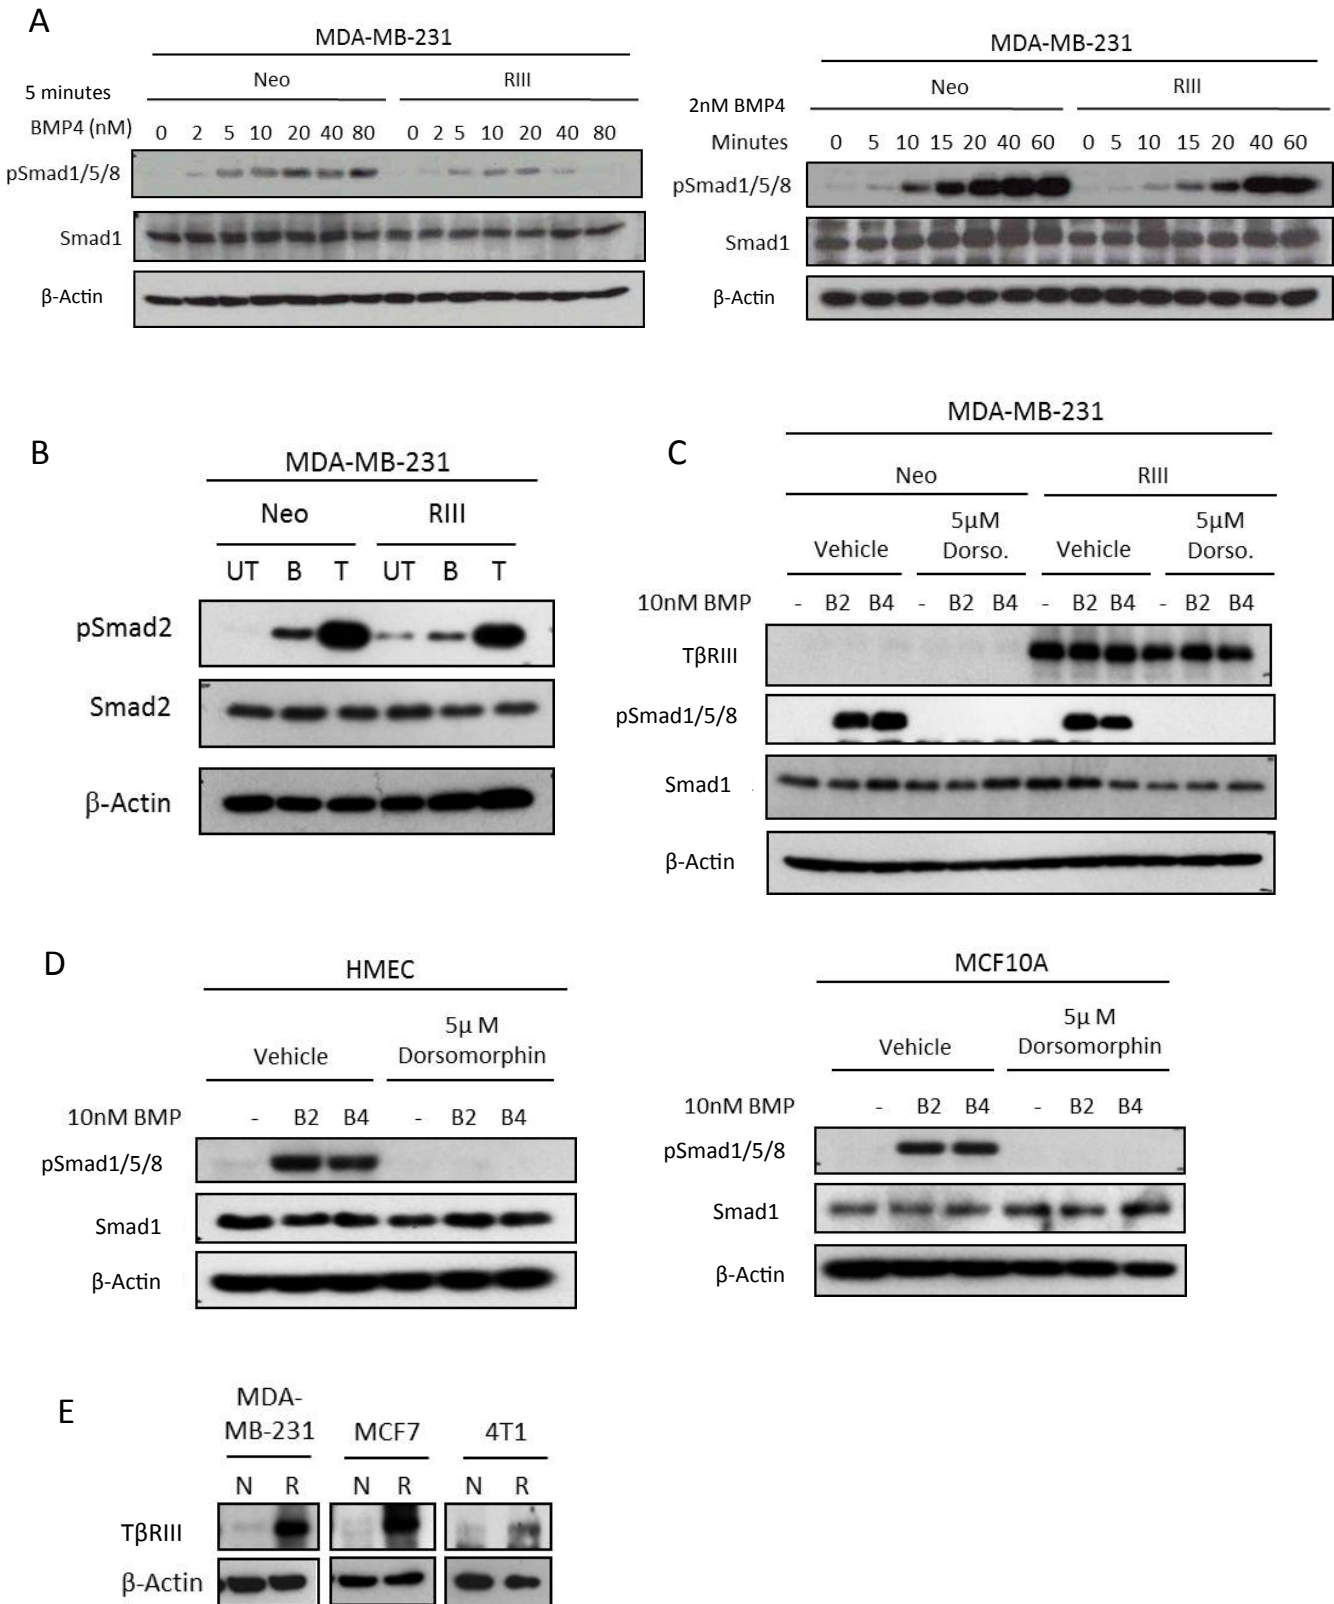

Figure S2

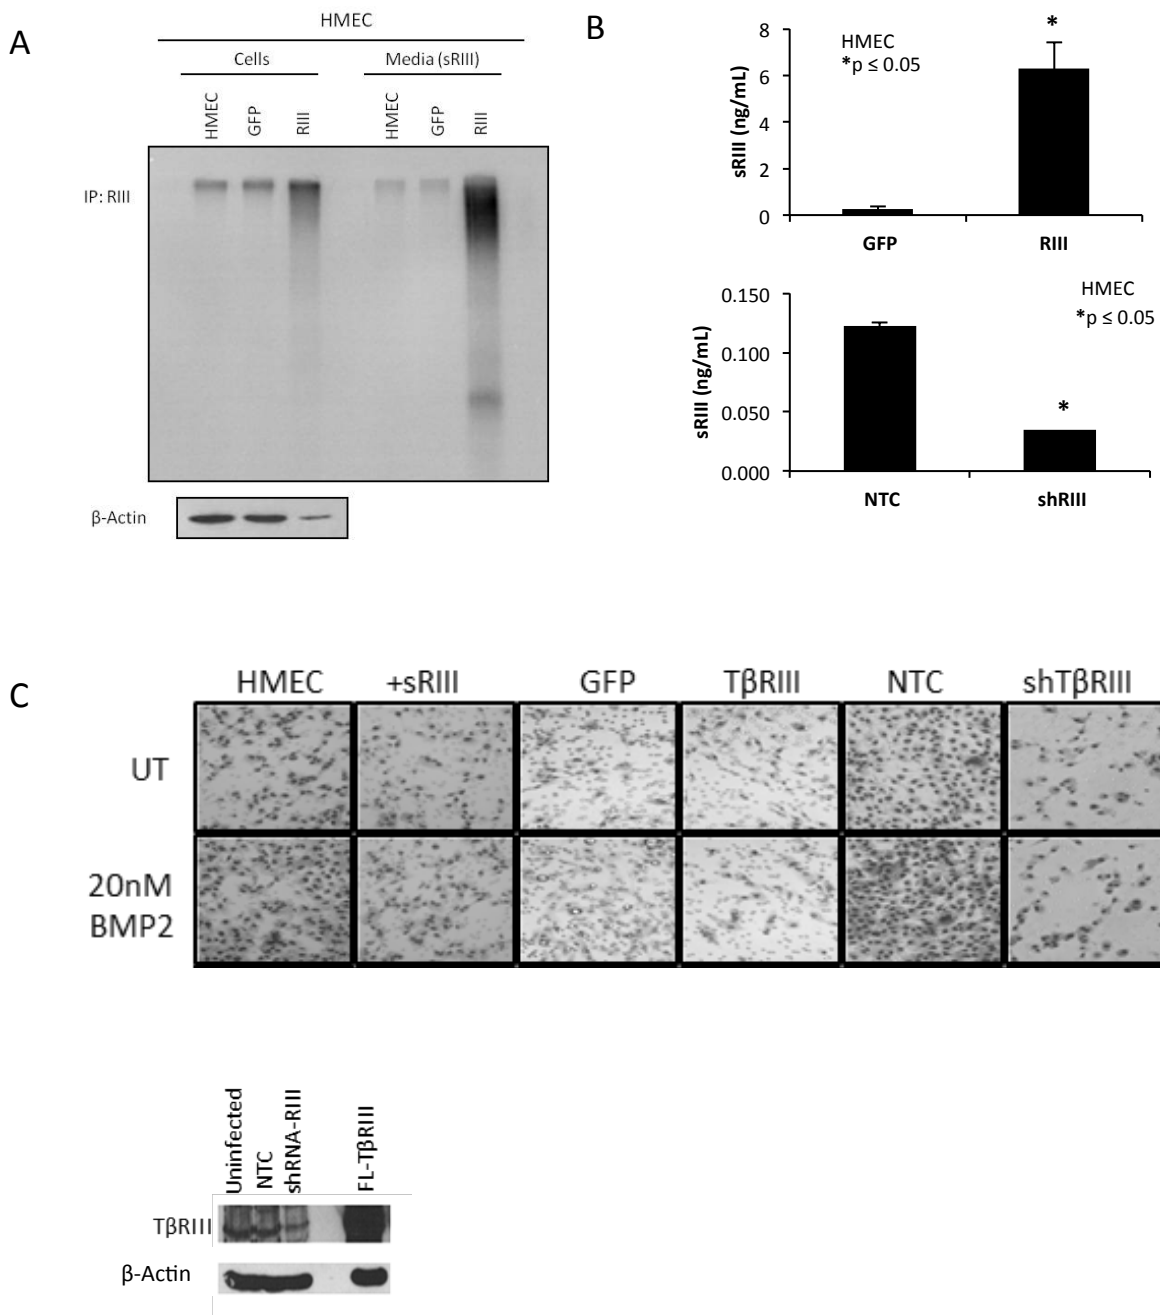

Figure S3

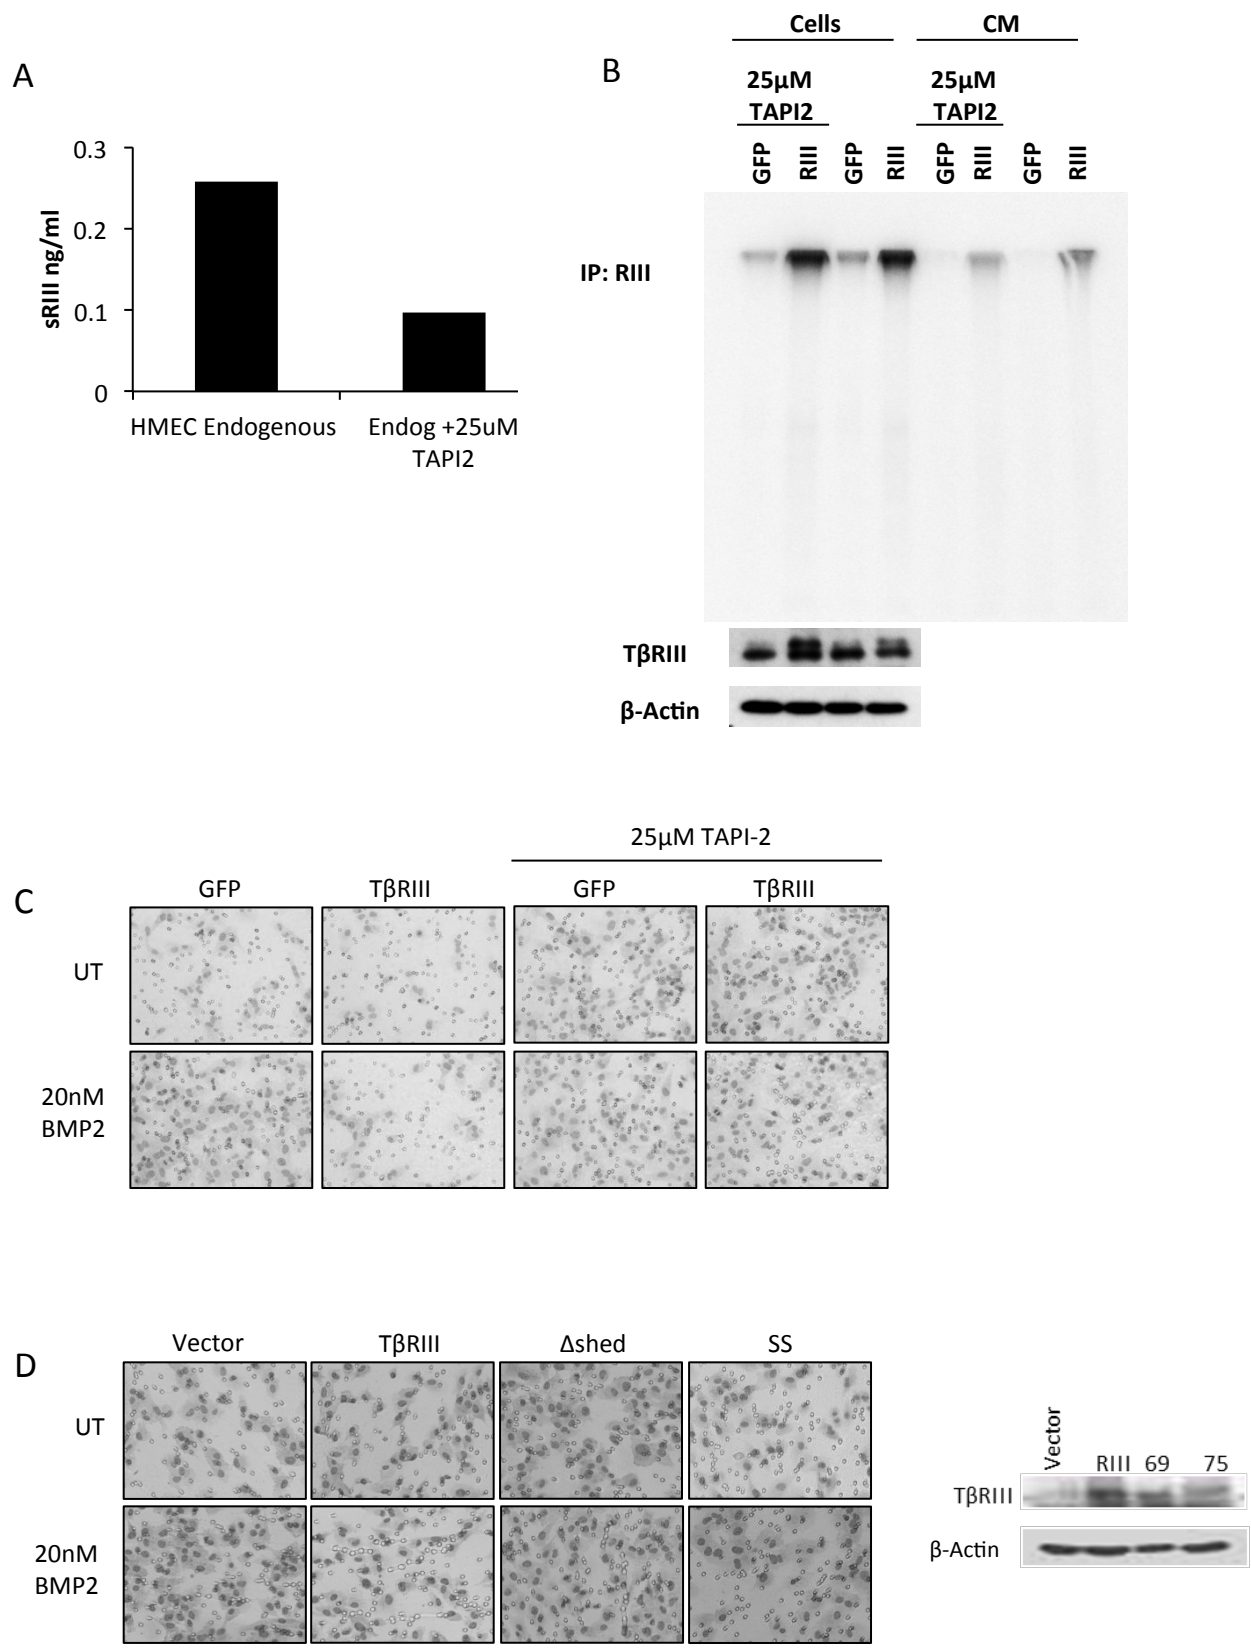

Figure S4

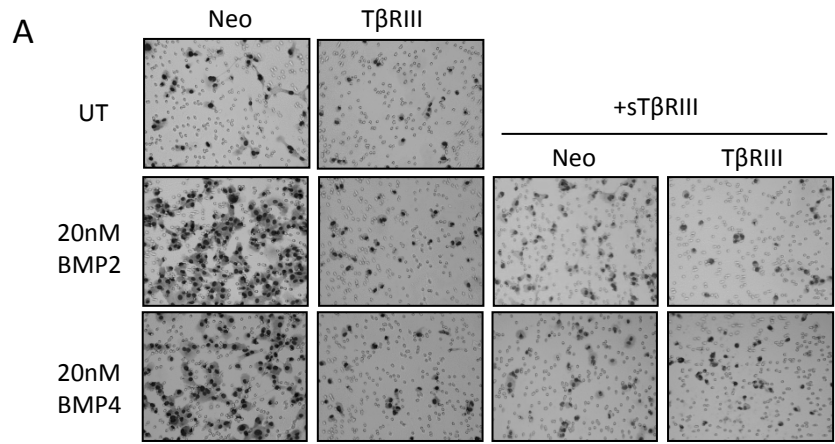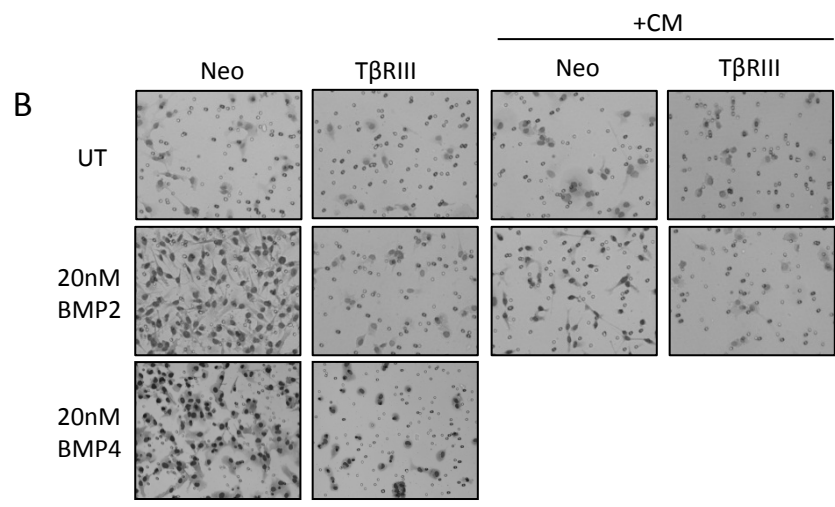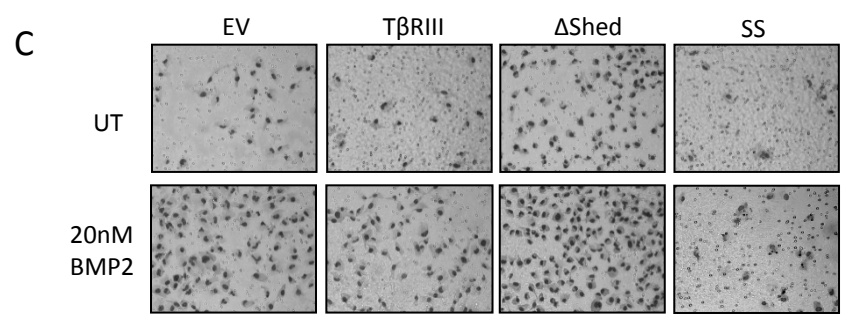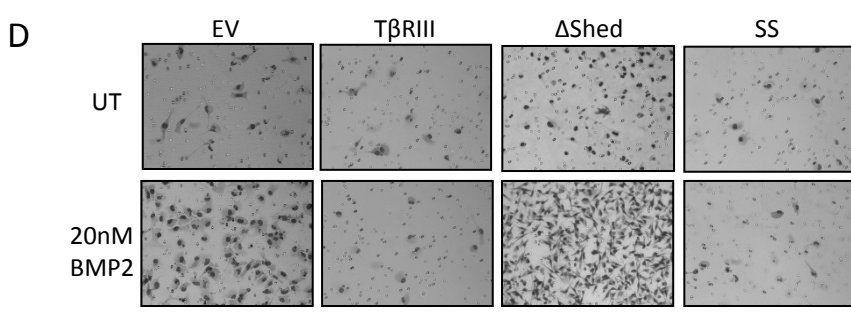

Supplement: mmc1.pdf [file mmc1.pdf]
